# Supplementary material for: Identification of SARS-CoV-2 Mpro inhibitors through deep reinforcement learning for de novo drug design and computational chemistry approaches
Source: Royal Society of Chemistry journal article supplement (doi:10.1039/d4md00106k), 2024-01-01
Supplement: d4md00106k2.pdf [file d4md00106k2.pdf]

ARTICLE

Supplementary Information

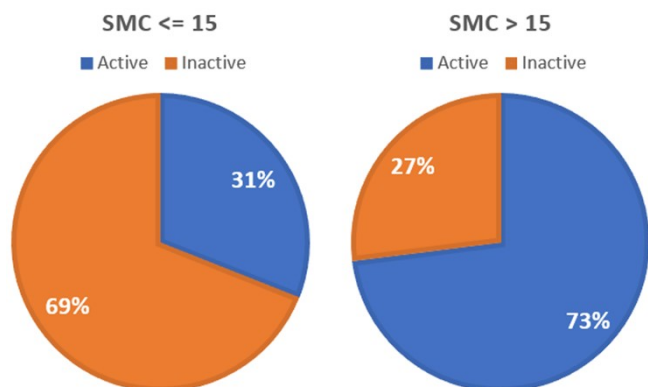

Figure 1. The pie charts represent the proportion of active versus inactive molecule for molecules with either a SMC <= 15 (n=815) or a SMC > 15 (n=125)

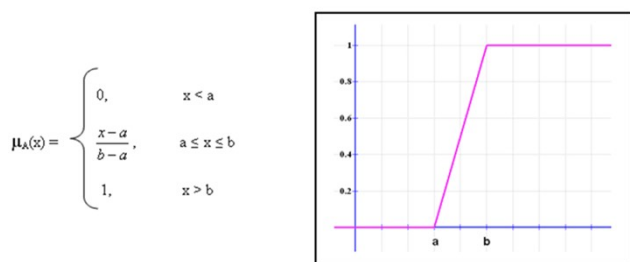

Figure 2. Membership trapezoidal scoring function, Substructure match count on the x axis and score on the y axis, a = 0 and b = 15

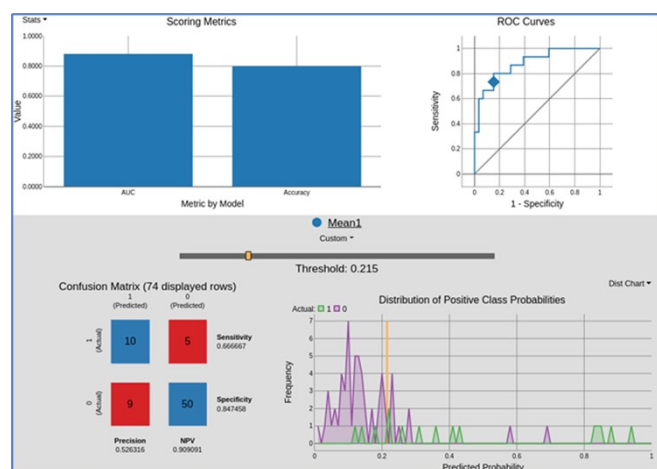

Figure 3. The figure was obtained from the Knime Binary Classification Inspector node. The view display performance of the RF-FPs, XGBoost-FPs and GCNN model ensemble on the validation set. On the top left the model's statistic bar chart: AUC and overall accuracy. On the top right the ROC curve. The confusion matrix on the bottom left and the distribution of positive class probabilities on the bottom right. The statistical metrics adapt according to the threshold value.

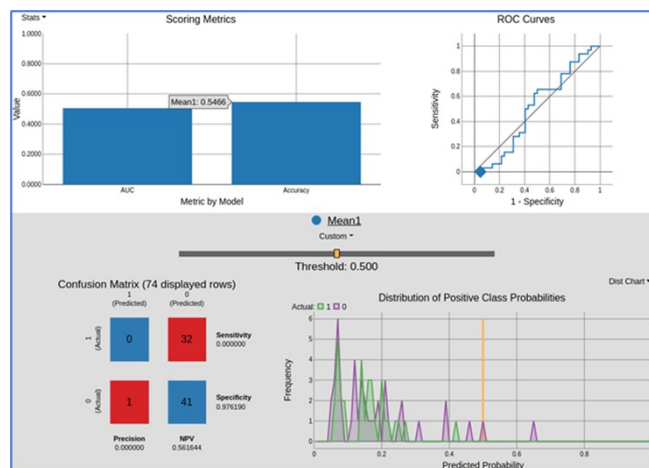

Figure 4. The figure was obtained from the Knime Binary Classification Inspector node. The view display performance of the RF-FPs, XGBoost-FPs and GCNN model ensemble on the test set. The view display performance of ML model predictions. On the top left the model's statistic bar chart: AUC and overall accuracy. On the top right the ROC curve. The confusion matrix on the bottom left and the distribution of positive class probabilities on the bottom right. The statistical metrics adapt according to the threshold value.

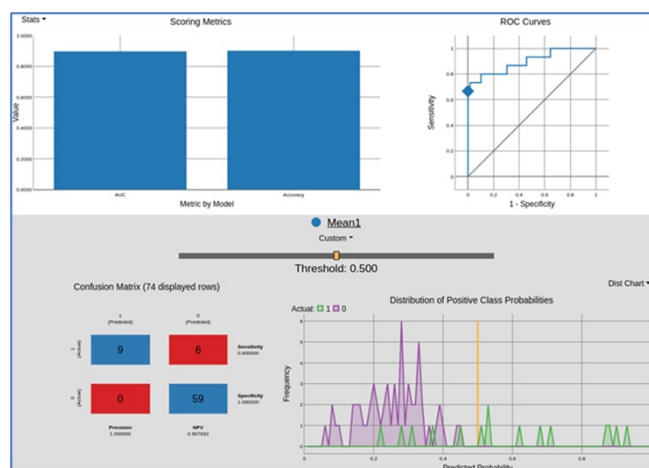

Figure 5. The view display performance of the RF-E3FP, XGBoost-E3FP model ensemble on the validation set. The view display performance of ML model predictions. On the top left the model's statistic bar chart: AUC and overall accuracy. On the top right the ROC curve. The confusion matrix on the bottom left and the distribution of positive class probabilities on the bottom right. The statistical metrics adapt according to the threshold value.

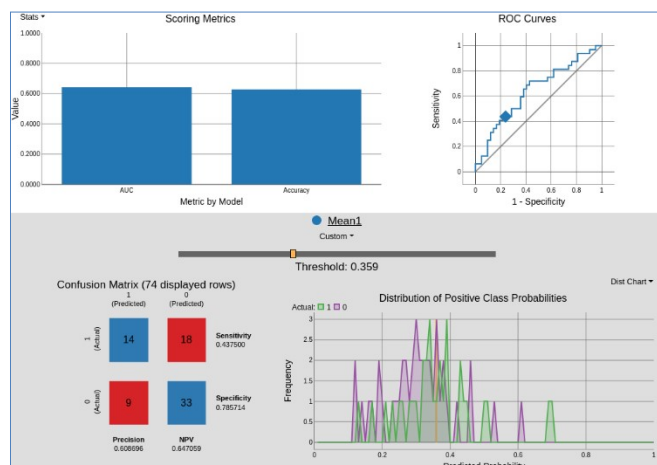

**Figure 6.** The view display performance of the RF-E3FP, XGBoost-E3FP model ensemble on the test set. The view display performance of ML model predictions. On the top left the model's statistic bar chart: AUC and overall accuracy. On the top right the ROC curve. The confusion matrix on the bottom left and the distribution of positive class probabilities on the bottom right. The statistical metrics adapt according to the threshold value.

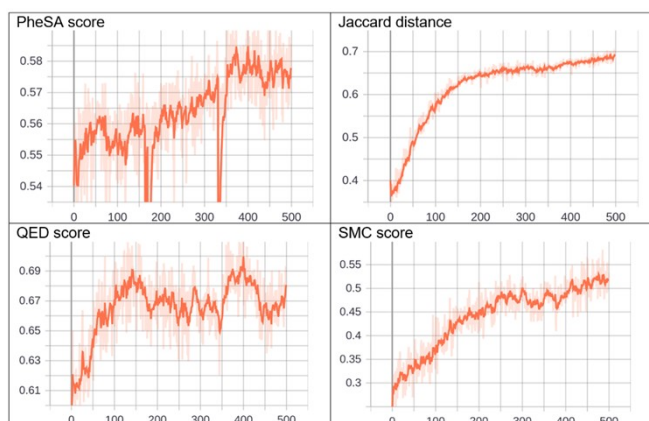

**Figure 7.** Tensorboard shows how the scores change over every epoch for the exploitation mode

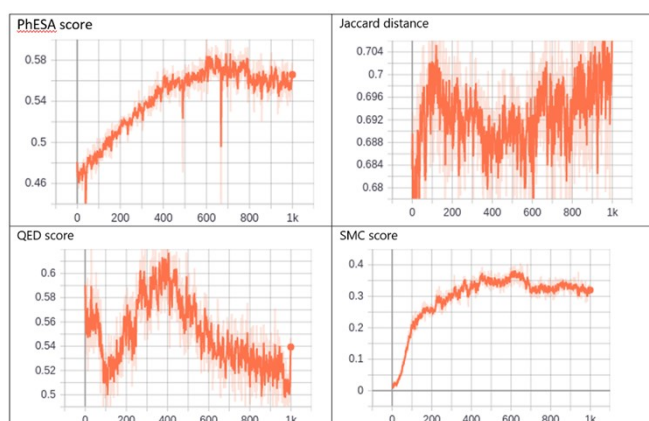

**Figure 8.** Tensorboard shows how the scores change over every epoch for the exploration mode

### Fluorescence resonance energy transfer (FRET)-based Mpro proteolytic activity assay

The enzymatic activity of the recombinant SARS-CoV-2 main protease Mpro was determined by a fluorescence resonance energy transfer (FRET) assay using a custom synthesized peptide substrate with (7-Methoxycoumarin-4-yl)acetyl [MCA] as fluorophore and 2,4-Dinitrophenyl [DNP] as fluorescence quencher: MCA-Ala-Val-Leu-Gln-Ser-Gly-Phe-Arg-Lys(Dnp)-Lys-NH<sub>2</sub>-trifluoroacetate salt (Bachem AG, Bubendorf CH). This peptide substrate amino acid sequence corresponds to the nsp4/nsp5 (Mpro) cleavage site. A substrate stock solution (10 mM) was prepared in 100 % DMSO. 40  $\mu$ L of a 4  $\mu$ M substrate solution prepared in H<sub>2</sub>O/TWEEN-20 0.01% was added to a solution (40  $\mu$ L) containing Mpro to start the enzymatic reaction. The final concentrations of the assay reaction ingredients (80  $\mu$ L) are 5 nM [E] Mpro, 2  $\mu$ M [S] peptide substrate (K<sub>m</sub> 3.17  $\mu$ M), 1 mM DTT, 0.5 mM EDTA, 1.2 % DMSO, 0.01 % TWEEN-20, 25 mM TRIS pH 7.4. Mpro was diluted (10 nM) from aliquotes stored as stock solution (512  $\mu$ M, -80  $^{\circ}$ C, storage buffer) in Mpro assay buffer (50 mM TRIS pH 7.4, 1 mM EDTA, 2 mM DTT, 0.01 % TWEEN-20). The rate of Mpro enzymatic activity ( $v$ ) was determined by monitoring the increase in fluorescence intensity of reactions at room temperature in black microplates (NUNC 384-well F-bottom) with an Infinite M-1000 plate reader (Tecan) using 325 nm and 400 nm as wavelengths for excitation and emission, respectively. Test compounds were dissolved in DMSO and screened first at a 25  $\mu$ M. 3-fold serial dilutions (125  $\mu$ M – 6.35 nM) of small molecule test compounds are added to determine inhibitory potency. IC<sub>50</sub> is determined by an in-house evaluation tool (IC<sub>50</sub> Studio with 4-parametric fitting, Hill-equation).

Small molecule compounds showing putative inhibitory activity were tested in a separate assay for quenching potential of fluorescence emitted by the MCA fluorophore (Bioquest) to identify possible false positives.

### Fluorimetric human liver Cathepsin L (hCatL) activity assay

To determine the effect of small molecule test compounds on the enzymatic activity of human Cathepsin L a fluorescence-based assay has been implemented according to a published protocol.<sup>[40]</sup>

Cathepsin L from human liver and the fluorogenic peptidomimetic substrate Z-Phe-Arg-7-amido-4-methylcoumarin hydrochloride (Z-FR-AMC) were purchased from SIGMA (#219402, #C9521). The Cathepsin L enzyme buffer consisted of 50 mM Tris pH 6.5, 5 mM EDTA, 200 mM NaCl, 2 mM DTT. The hCatL enzymatic reaction was initiated by adding 40  $\mu$ L of a solution containing the substrate at 4  $\mu$ M (50 mM Tris pH 6.5, 5 mM EDTA, 200 mM NaCl, 0.005 % triton-X-100) to 40  $\mu$ L solution consisting of enzyme in assay buffer (50 mM Tris pH 6.5, 5 mM EDTA, 200 mM NaCl, 2 mM DTT, 1 nM Ca). Test compounds dissolved in DMSO were dispensed as 2-fold serial dilutions (125  $\mu$ M – 244 nM) to black well assay plates (384 well, NUNC).

Final assay reaction mixtures consisted of Cathepsin L 0.5 nM [E], Z-Phe-Arg7-amido-4-methylcoumarin [S], [cpds] 125 – 0.214  $\mu$ M or 50 – 0.0977  $\mu$ M, 50 mM Tris-HCl pH 6.5, 200 mM NaCl, DTT 1 mM, 2.5 mM EDTA, Triton-X100 0.0005%, DMSO 1.27 %.

Fluorescence emitted by AMC fluorophore liberated by hCatL cleavage of the substrate was measured with a Tecan infinite M-1000 plate reader with filters for excitation at 360/40 nm and emission at 460/40 nm at RT immediately after initiating the reaction t0 and 35 min incubation at RT.

Leupeptin (SIGMA L5793) a validated natural protease inhibitor shows the expected biochemical potency in this assay with an IC50 value of around 2 nM.

#### Cloning, protein expression and purification of SARS-CoV-2 Mpro

DNA encoding a recombinant fusion protein composed of SUMO with a N-terminal hexa-histidine tag and Mpro (NC\_045512.2, Nsp5, YP\_009742612, Wuhan-Hu-1) was codon optimized for expression in *E. coli* and synthesized at Genscript. The synthetic DNA was cloned into pET29a(+):[NdeI, BamHI] (Genscript) and transformed into BL21(DE3) cells. The fusion protein was expressed overnight (Luria broth medium, 25  $\mu$ g/ml Kanamycin) at 18 °C after induction with 0.5 mM isopropyl- $\beta$ -D-thiogalactoside IPTG at OD600~0.7. Overnight cultures were spun down and recovered cell paste was stored at -70 °C. 12 g cell paste was resuspended in buffer (20 mM Tris-HCl, pH 7.8; 150 mM NaCl, 5 mM imidazole) and treated with lysozyme (0.1mg/ml; 30 min) and benzonase (2500 Units, 10 mM MgCl<sub>2</sub>; 15 min, RT). Bacterial cells were lysed by high pressure homogenization (29008 psi, Microfluidics MP110P, DIX H10Z) and centrifuged 30 min at 16000 rpm (Fiberlite F21-8x50y). The hexa-histidine SUMO-Mpro fusion protein was purified by immobilized metal affinity chromatography (IMAC) with a HisTrap column (5 ml, Cytiva) connected to a FPLC Äkta purifier 100 system. His-tagged SUMO\_Mpro fusion protein was eluted with a linear gradient of increasing imidazole concentration (elution buffer, 0-100 %, 20 column volumes, 20 mM Tris-HCl pH 7.8, 150 mM NaCl, 500 mM imidazole). Eluate fractions containing the target protein were combined and concentrated (Amicon, 10 kDa). The fusion protein was treated with SUMO protease (Sigma SAE0067, 5 U/ mg target protein) to liberate Mpro with authentic N-(Ser1) and C- termini (Q306)-C. The mixture of SUMO protease cleavage products was dialyzed overnight (4 °C, 4 L, 20 mM Tris-HCl, 150 mM NaCl, Slide-A-Lyzer® cassette, 10 kDa, Thermo Scientific). The hexa-histidine tagged SUMO protein was separated from non-tagged authentic Mpro present in the dialysate by IMAC and collecting Mpro in the flow through. Mpro was further purified by size exclusion chromatography (SEC, Hiloal 26/60 Superdex 200) with storage buffer (20 mM Tris-HCl, 150 mM NaCl, 1 mM TCEP, 1 mM EDTA). The SEC elution volume for Mpro indicated a dimer as the oligomeric state. Pure (97 %, LC MS) Mpro was concentrated (Amicon, 10 kDa) to a concentration of 17 mg/ml (512  $\mu$ M) Mpro and stored at -70 °C.

#### Surface plasmon resonance (SPR) binding analysis

The SPR experiments were performed using a Biacore T200 equipped with a Series S Sensor Chip SA (GE Healthcare #BR-1005-31). Biotinylated COVID-19 Mpro C145A Q306E.AVI (35731 Da, >85% pure, only 21% biotinylated based on MS, DNA sequence available in the SI) was immobilized to the streptavidin covalently attached to a carboxymethyl dextran matrix. The initial conditioning of the surfaces on flow cell 1 and 2 was performed by three 1-minute pulses of 1 M NaCl, 50 mM NaOH solution. The ligand at a concentration of 0.27mg/ml in immobilization buffer (10 mM HEPES, 150 mM NaCl, 1mM TCEP, 0.05% P20, pH 7.4) was immobilized at a density of 4300 RU on flow cell 2 at a flow rate of 5  $\mu$ l/min and flow cell 1 was left blank to serve as a reference surface. Surfaces were stabilized with 3 hours injection at a flow rate of 40  $\mu$ l/min of running buffer (10 mM HEPES, 150 mM NaCl, 1mM TCEP, 0.05% P20, 5% DMSO, pH 7.4).

To collect kinetic binding data, sample in 10 mM HEPES, 150 mM NaCl, 0.05% P20, 5%DMSO, pH 7.4, was injected over the two flow cells at ascending concentrations (0, 0.27, 0.82, 2.5, 7.5, 22.2, 66.6 and 200  $\mu$ M) at a flow rate of 40  $\mu$ l/min and at a temperature of 25°C. The complex was allowed to associate and dissociate for 40 and 100 s, respectively for each sample concentration.

A DMSO correction curve was performed before/after every 104 cycles.

Data were collected at a rate of 10 Hz and fitted to a simple 1:1 interaction model using the global data analysis option available within Biacore T200 Evaluation software.

#### Crystallization and crystallography

Sitting drop co-crystallization was carried out by adding 0.3  $\mu$ l each of Mpro (17 mg/ml, buffer as described above) and crystallization solution in 96-well plates (Intelliplate, Art Robbins). The inhibitors were added to the protein approximately one hour before crystallization. Compound 9 and compound 7 were added to Mpro at a final concentration of 1 mM from a 10 mM stock solution in DMSO, while compound 11 was added at a final concentration of 10 mM from a 100 mM stock solution in DMSO.

The inhibitors compound 11 and compound 7 were co-crystallized using 10% (w/v) polyethylene glycol (PEG) 4000, 20% (w/v) glycerol, 0.03 M each of sodium fluoride, sodium bromide and sodium iodide, 0.1 M MES/imidazole pH 6.5 (condition B3 of "Morpheus I" screen, Molecular Dimensions Ltd.). Compound 9 was co-crystallized using 0.1 M MES/imidazole pH 6.5, 10% (w/v) polyethylene glycol 4000, 20% (w/v) glycerol, 0.03 M each of magnesium chloride and calcium chloride (condition A3 of Morpheus I screen, Molecular Dimensions Ltd).

X-ray diffraction experiments were carried out at 100 K at beamline X06SA-PXI of the Swiss Light Source (SLS), Villigen, Switzerland. Measurements were made at the SLS with crystal rotation steps of 0.2 ° using an EIGER 16M detector (Dectris).

The data were processed and scaled using AutoProc<sup>[41]</sup> and XSCALE<sup>[42]</sup>, respectively. Automated molecular replacement

was carried out using Dimple<sup>[43]</sup> (Collaborative Computational Project 1994) with the 3CLpro structure as template. COOT<sup>[44]</sup> was used for model building. Phenix.refine<sup>[45]</sup>, Buster<sup>[45]</sup> and Refmac<sup>[46]</sup> were used for refinement of the structures. Data

collection and refinement statistics are reported in Table 3 and Figures of molecular structures were generated with PyMOL(Schrodinger 2015)

**Table 1.** Delivered AI molecules and their biological data

| Structure                                                                           | Compound # | Mpro_FRET_DTT_IC50 [umol/l] | Mpro_Biacore_KD [uM] | CathL_FRET_IC50 [umol/l] | Mpro_MCA_IC50[umol/l] |
|-------------------------------------------------------------------------------------|------------|-----------------------------|----------------------|--------------------------|-----------------------|
| 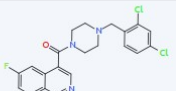   | 1          | 3.27                        |                      | >125                     | >125                  |
|    | 2          | 63.0                        |                      | >125                     | >125                  |
|    | 3          | 63.5                        |                      | >125                     | >125                  |
|    | 4          | NA                          | 185                  | >125                     | >125                  |
|    | 5          | NA                          | 368                  | >125                     | >125                  |
|    | 6          | 22.6                        | 32.8                 | 103                      | >125                  |
|    | 13         | >125                        |                      | >125                     | >125                  |
|   | 14         | >125                        | >400                 | >125                     |                       |
|  | 15         | >125                        | >400                 | >125                     |                       |
|  | 16         | >125                        |                      | >125                     | >125                  |
|  | 17         | >125                        |                      | >125                     | >125                  |
|  | 18         | >125                        |                      | >125                     | >125                  |
|  | 19         | >125                        |                      | >125                     | >125                  |
|  | 20         | >125                        |                      | >125                     | >125                  |
|  | 21         | 66.9                        |                      | >125                     | >125                  |
|  | 22         | >125                        |                      | >125                     | >125                  |

**Table 2.** Compounds identified in the frame of the hit expansion and follow-up optimized compounds

| Structure                                                                         | Compound # | Mpro_FRET_DTT_IC50 [ $\mu\text{mol/l}$ ] | Mpro_Biacore_KD [ $\mu\text{M}$ ] | CathL_FRET_IC50 [ $\mu\text{mol/l}$ ] | Mpro_MCA_IC50 [ $\mu\text{mol/l}$ ] |
|-----------------------------------------------------------------------------------|------------|------------------------------------------|-----------------------------------|---------------------------------------|-------------------------------------|
| 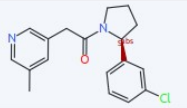 | 7          | 2.10                                     |                                   | >125                                  | >125                                |
|  | 8          | 24.228 (mean, n=4)                       | 49.8                              | >124.8 (mean, n=5)                    | >96.625 (mean, n=4)                 |
|  | 9          | 26.2                                     | 37.8                              | >125                                  | >125                                |
|  | 10         | 62.6                                     | 324                               | >125                                  | >125                                |
|  | 11         | 1.26                                     |                                   | >125                                  |                                     |
|  | 12         | 2.31 (mean, n=2)                         |                                   | >125 (mean, n=2)                      | >125 (mean, n=2)                    |

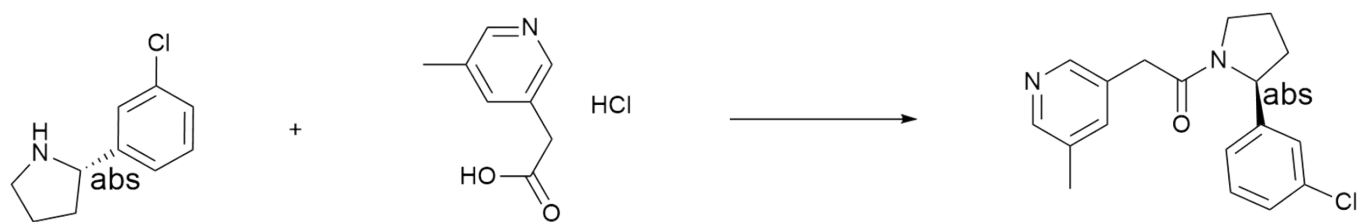

**Scheme 1** Synthetic route to compound 7. Reagents and conditions: HATU, DIPEA, DMF, RT

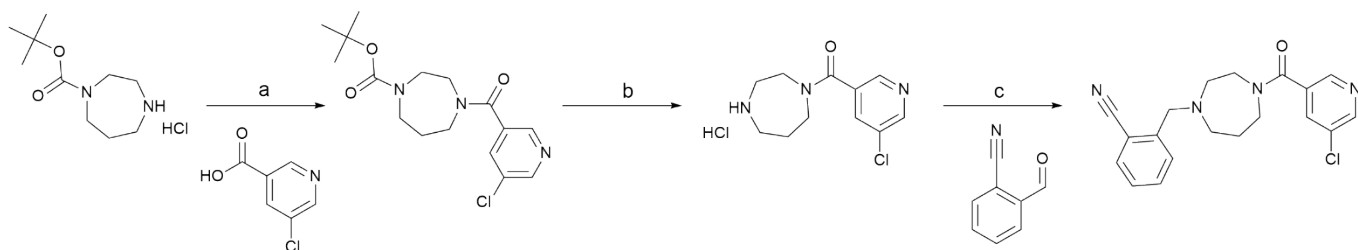

**Scheme 2** Synthetic route to compound 8. Reagents and conditions: (a) HATU, DIPEA, DMF, RT; (b) HCl, MeOH, RT; (c) NaBH(OAc)<sub>3</sub>, DIPEA, DCM, RT

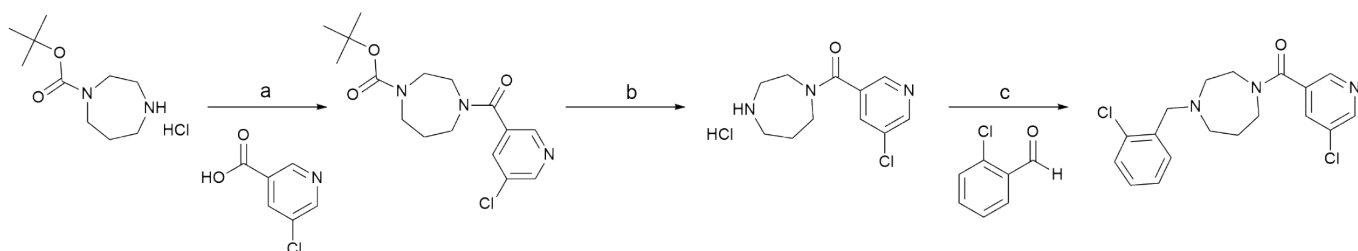

**Scheme 3** Synthetic route to compound 11. Reagents and conditions: (a) HATU, DIPEA, DMF, RT; (b) HCl, MeOH, RT; (c) NaBH(OAc)<sub>3</sub>, DIPEA, DCM, RT

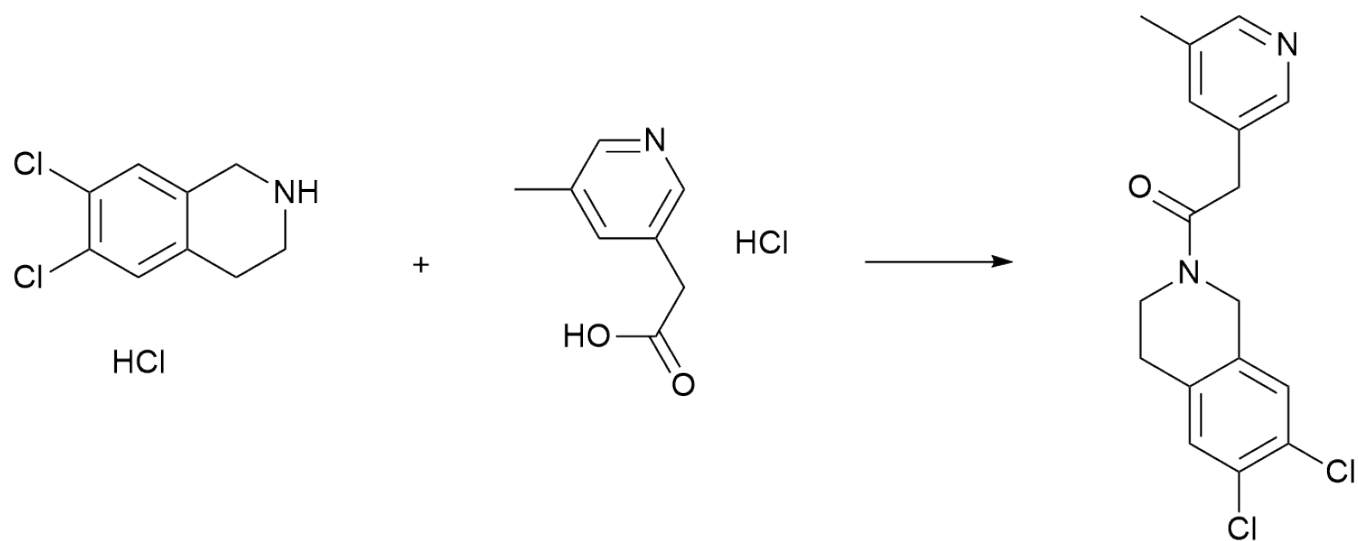

**Scheme 4** Synthetic route to compound 12. Reagents and conditions: HATU, DIPEA, DMF, RT

**Table 3.** X-ray data collection and processing for compounds 7, 8, 11 and 12

| Compound                                       | Cpd 7                             | Cpd 8                           | Cpd 11                           | Cpd 12                            |
|------------------------------------------------|-----------------------------------|---------------------------------|----------------------------------|-----------------------------------|
| Diffraction source                             | Swiss Light Source, X06DA (PXIII) | Swiss Light Source, X06SA (PXI) | Swiss Light Source, X06DA (PXII) | Swiss Light Source, X06DA (PXIII) |
| Wavelength (Å)                                 | 1.00                              | 1.00                            | 1.00                             | 1.00                              |
| Temperature (K)                                | 100                               | 100                             | 100                              | 100                               |
| Detector                                       | Eiger 16M                         | Eiger 16M                       | Eiger 16M                        | Eiger 16M                         |
| Crystal to detector distance (mm)              | 135                               | 135                             | 150                              | 135                               |
| Total rotation range (°)                       | 180                               | 360                             | 180                              | 360                               |
| Rotation per image (°)                         | 0.25                              | 0.20                            | 0.25                             | 0.20                              |
| Exposure time per image (s)                    | 0.120                             | 0.015                           | 0.250                            | 0.125                             |
| Space group                                    | P 21 21 21                        | P 21 21 21                      | P 21 21 21                       | P 21 21 21                        |
| a, b, c (Å)                                    | 68.1 102.0 104.7                  | 68.0 100.3 104.6                | 67.8 101.2 103.8                 | 68.0 101.8 105.0                  |
| $\alpha$ $\beta$ , $\gamma$ (°)                | 90 90 90                          | 90 90 90                        | 90 90 90                         | 90 90 90                          |
| Mosaicity (°)                                  | 0.19                              | 0.16                            | 0.12                             | 0.08                              |
| Resolution range (Å)<br>(highest shell)        | 51.0-1.31<br>(1.40-1.31)          | 56.76-1.59<br>(1.76-1.59)       | 72.47-1.34<br>(1.42-1.34)        | 49.80-1.30<br>(1.33-1.30)         |
| Total no. of reflections                       | 777335 (34443)                    | 538998 (26606)                  | 897063 (36301)                   | 1190708 (84732)                   |
| No. of unique reflections                      | 142995 (7149)                     | 81101 (4055)                    | 136333 (6816)                    | 179022 (13124)                    |
| Completeness (%)<br>(spherical)                | 81.8 (21.9)                       | 73.2 (15.9)                     | 84.3 (25.4)                      | 99.8 (99.7)                       |
| Completeness (%)<br>(ellipsoidal)              | 93.7 (52.1)                       | 94.8 (61.4)                     | 96.1 (66.4)                      | Not calculated                    |
| Multiplicity                                   | 5.4 (4.8)                         | 6.6 (6.6)                       | 6.6 (5.3)                        | 3.4 (3.3)                         |
| $\langle I/\sigma(I) \rangle$ from merged data | 7.6 (1.6)                         | 13.9 (1.8)                      | 15.4 (1.7)                       | 10.3 (1.1)                        |
| CC <sub>1/2</sub> (highest shell)              | (50.2)                            | (54.4)                          | (69.0)                           | (36.5)                            |



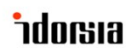

## HTS QC Analysis Report

Sample Name: LCMS384-20221005-1\_E11

## Compound 1

Instrument: ICHALW-DL00012-TQD

Acquisition time: 10/6/2022 12:12 AM  
Result

## Expression

Auto-Comments

Auto-Summary

Purity

Target Mass

Target RT

GOOD

96.4000

418.3000

0.8750

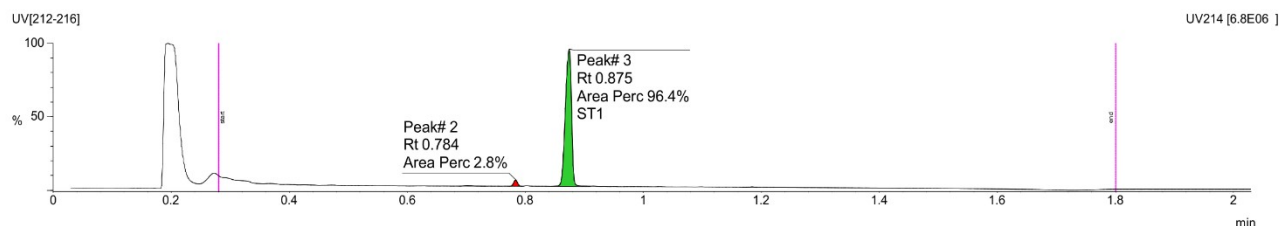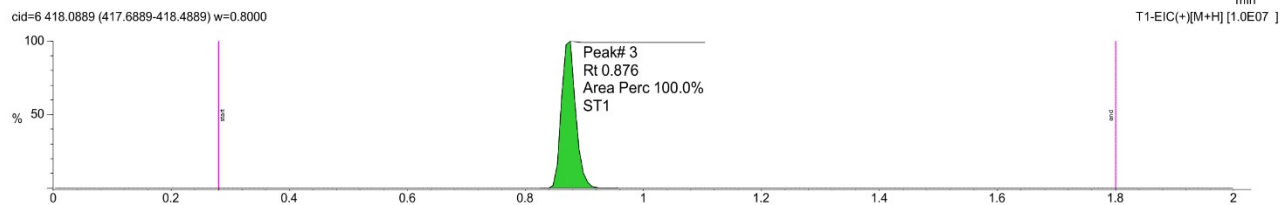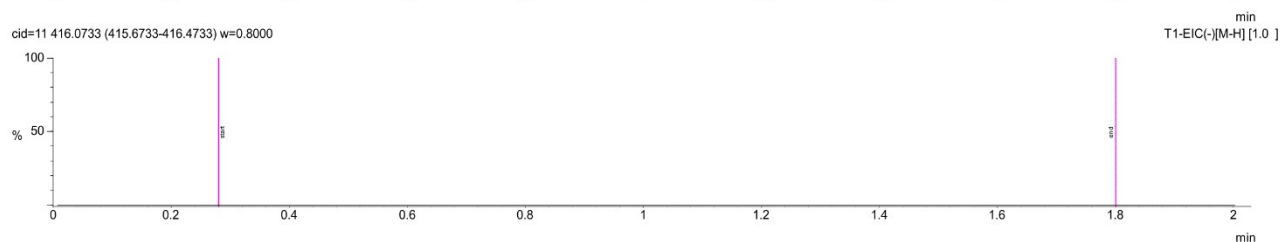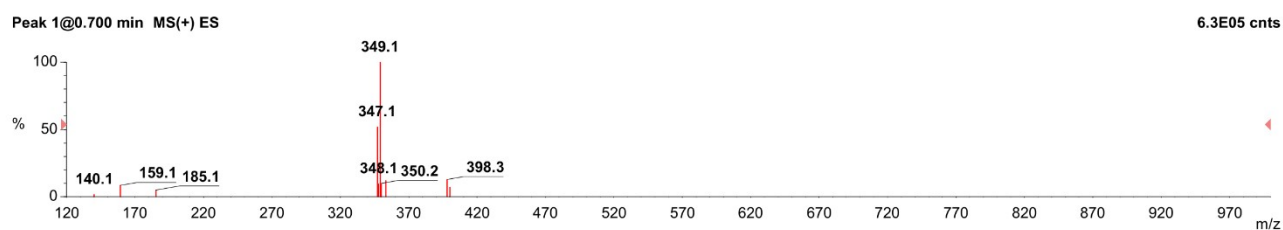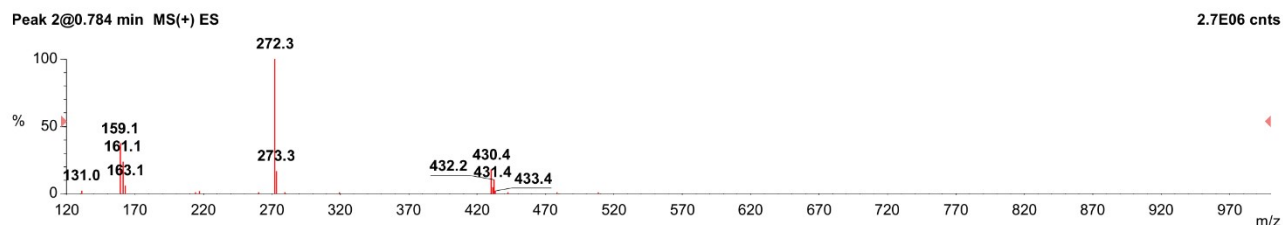

Printed: 10/6/2022 1:49 PM

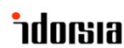

## HTS QC Analysis Report

Sample Name: LCMS384-20221005-1\_E11

## Compound 1

Instrument: ICHALW-DL00012-TQD

Acquisition time: 10/6/2022 12:12 AM

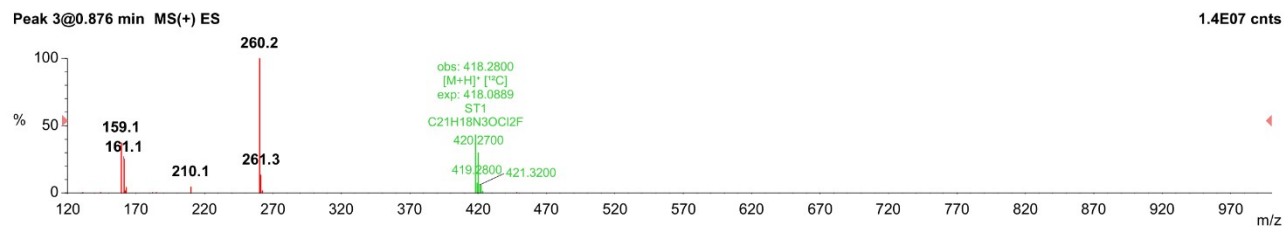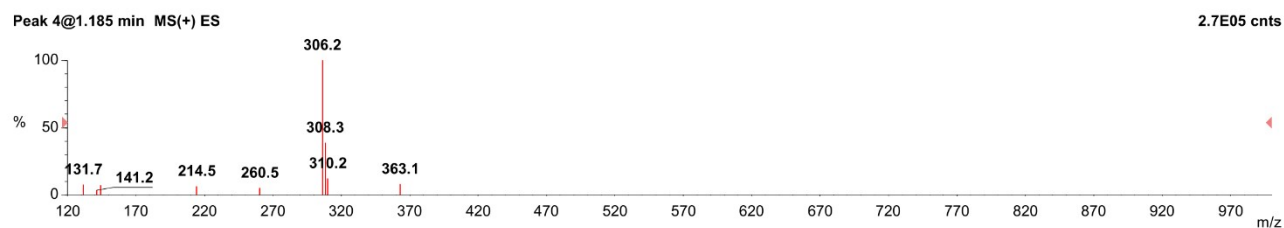

Printed: 10/6/2022 1:49 PM

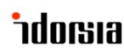

## HTS QC Analysis Report

Sample Name: LCMS384-20221005-1\_C13

Compound 2  
Instrument: ICHALW-DL00012-TQDAcquisition time: 10/6/2022 12:32 AM  
Result

## Expression

Auto-Comments

Auto-Summary

Purity

Target Mass

Target RT

GOOD

97.0000

416.3000

0.9160

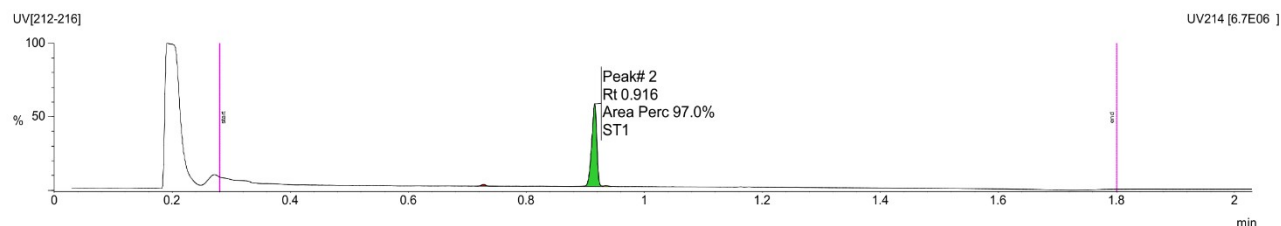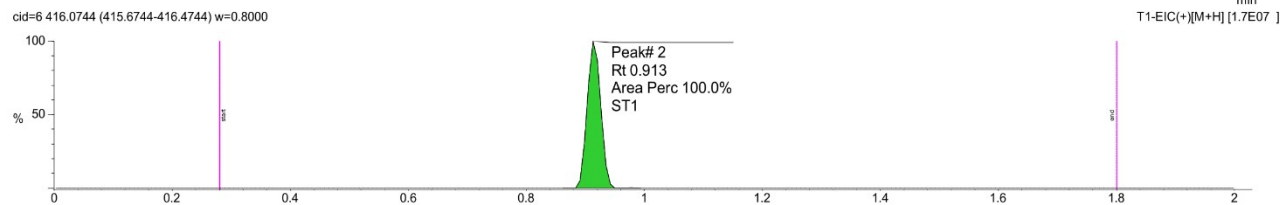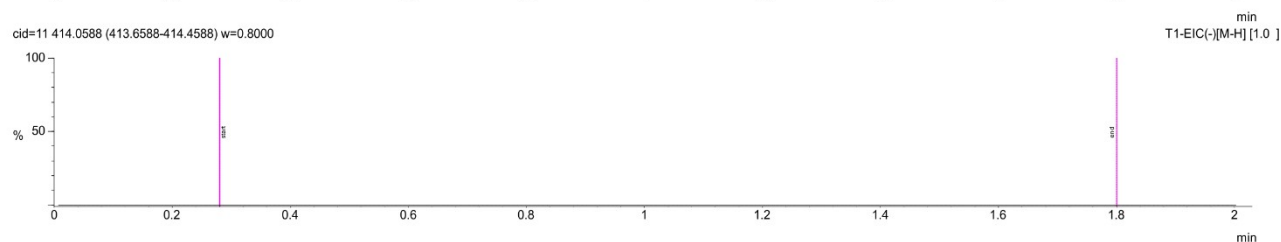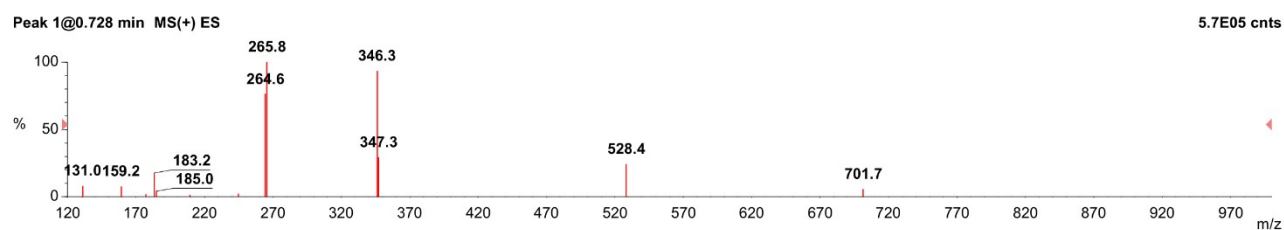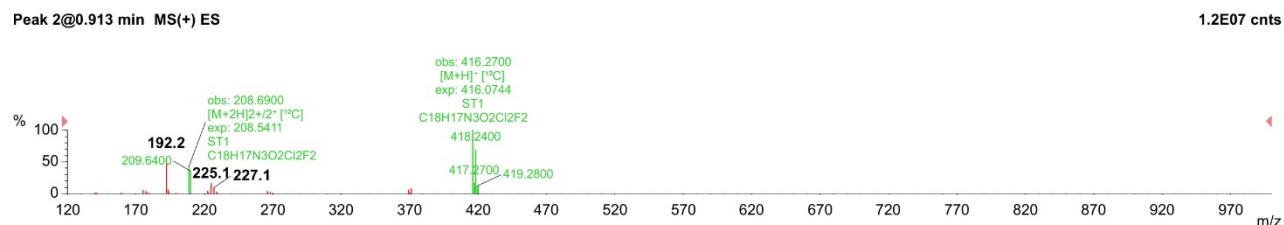

Printed: 10/6/2022 1:49 PM



## HTS QC Analysis Report

Sample Name: LCMS384-20221005-1\_M11

Compound 3

Instrument: ICHALW-DL00012-TQD

Acquisition time: 10/6/2022 12:23 AM  
Result

## Expression

Auto-Comments

Auto-Summary

Purity

Target Mass

Target RT

GOOD

99.4000

350.2000

0.6310

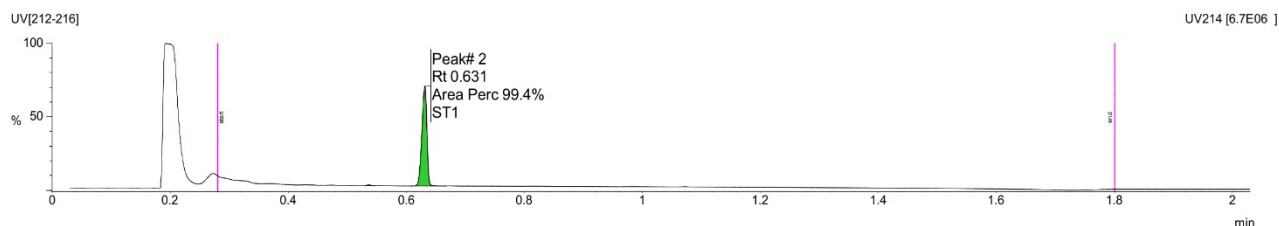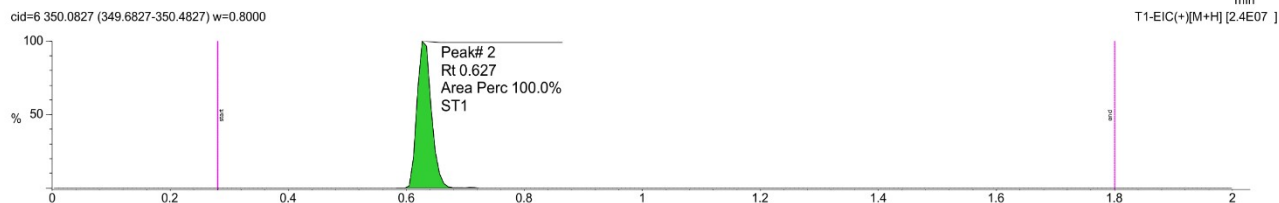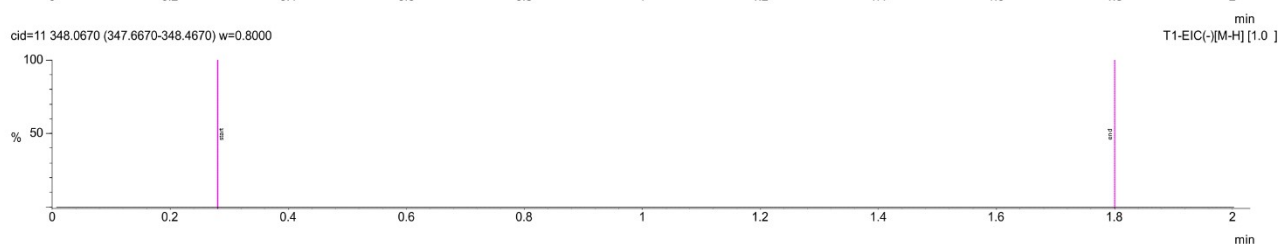

## Peak 1@0.537 min MS(+) ES

2.6E05 cnts

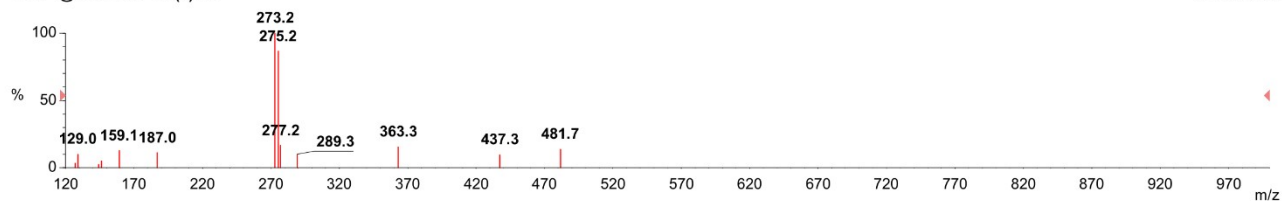

## Peak 2@0.627 min MS(+) ES

1.5E07 cnts

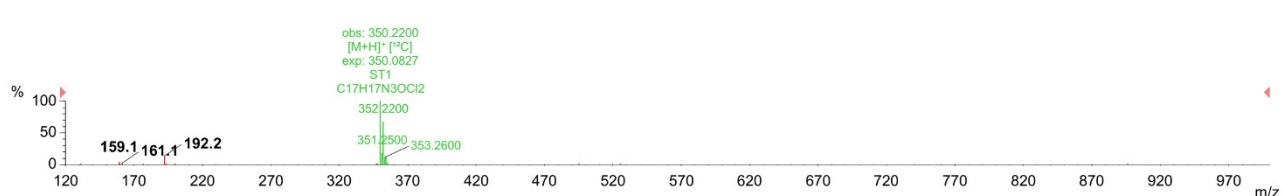

Printed: 10/6/2022 1:48 PM

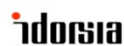

## HTS QC Analysis Report

Sample Name: LCMS384-20221005-1\_E13

Compound 4

Instrument: ICHALW-DL00012-TQD

Acquisition time: 10/6/2022 12:35 AM

## Expression

Auto-Comments

Auto-Summary

Purity

Target Mass

Target RT

## Result

GOOD

89.9000

372.3000

1.1020

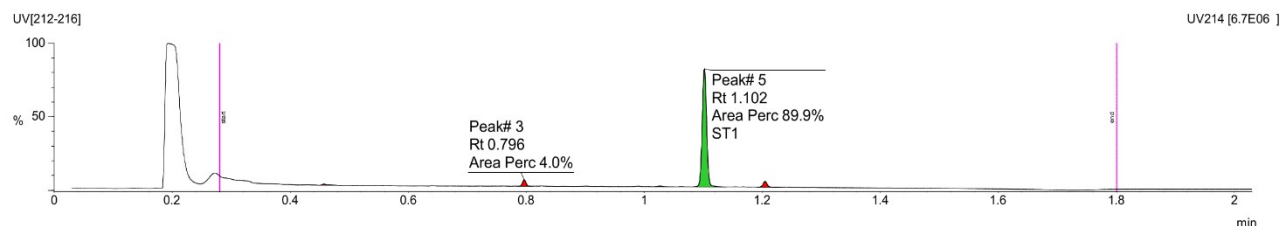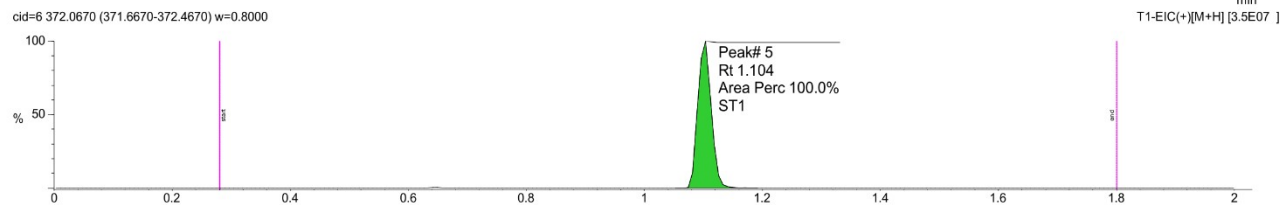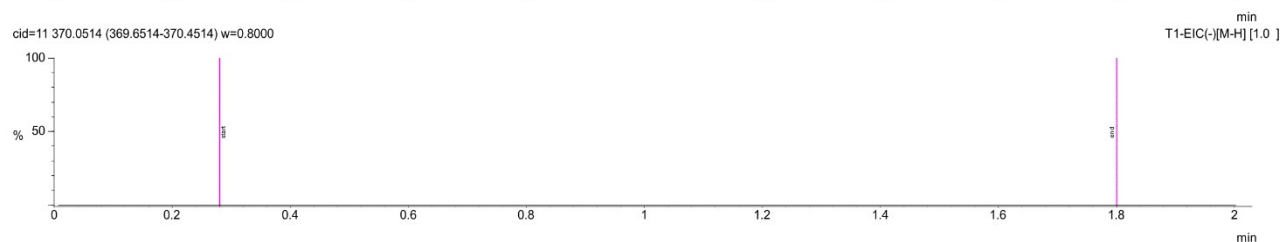

## Peak 1@0.457 min MS(+) ES

5.5E05 cnts

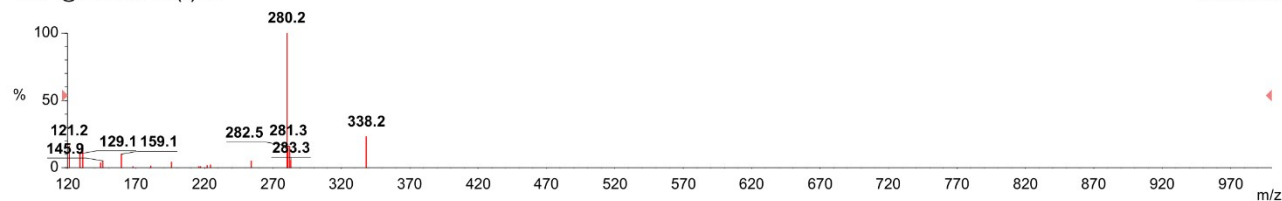

## Peak 3@0.796 min MS(+) ES

1.2E06 cnts

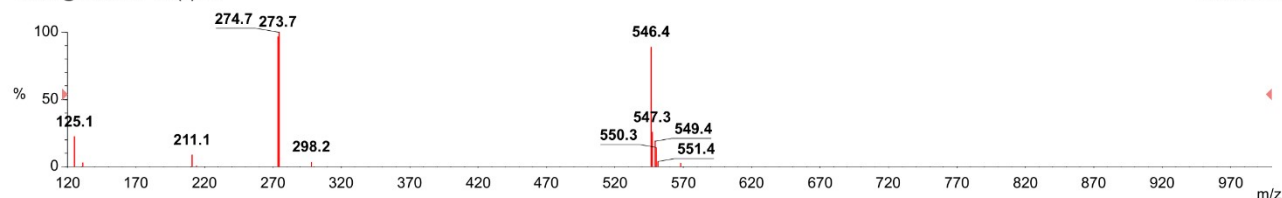

Printed: 10/6/2022 1:48 PM

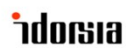

## HTS QC Analysis Report

Sample Name: LCMS384-20221005-1\_E13

Compound 4

Instrument: ICHALW-DL00012-TQD

Acquisition time: 10/6/2022 12:35 AM

Peak 5@1.104 min MS(+) ES

2.0E07 cnts

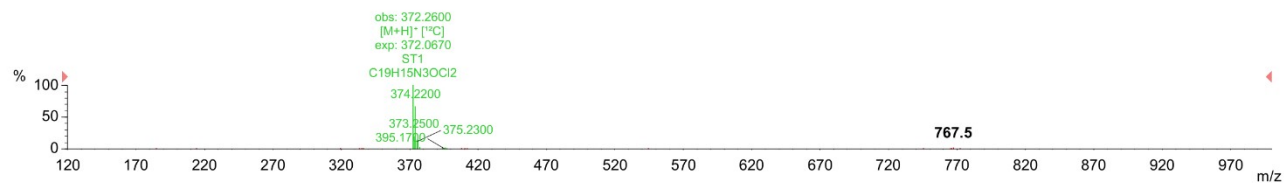

Peak 6@1.205 min MS(+) ES

5.5E06 cnts

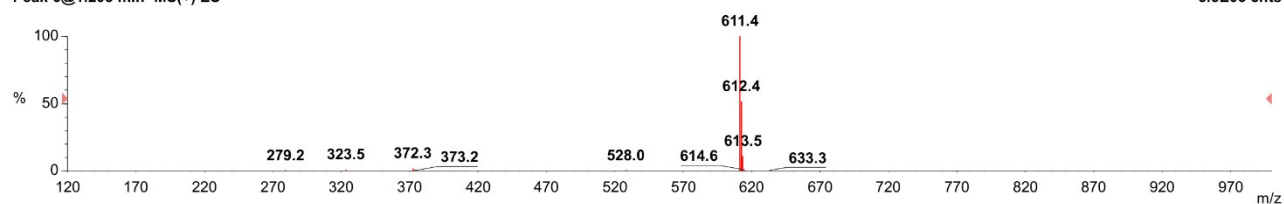

Printed: 10/6/2022 1:48 PM



## HTS QC Analysis Report

Sample Name: LCMS384-20221005-1\_I11

Compound 5

Instrument: ICHALW-DL00012-TQD

Acquisition time: 10/6/2022 12:17 AM

## Expression

Auto-Comments

Auto-Summary

Purity

Target Mass

Target RT

## Result

GOOD

97.2000

372.2000

1.0370

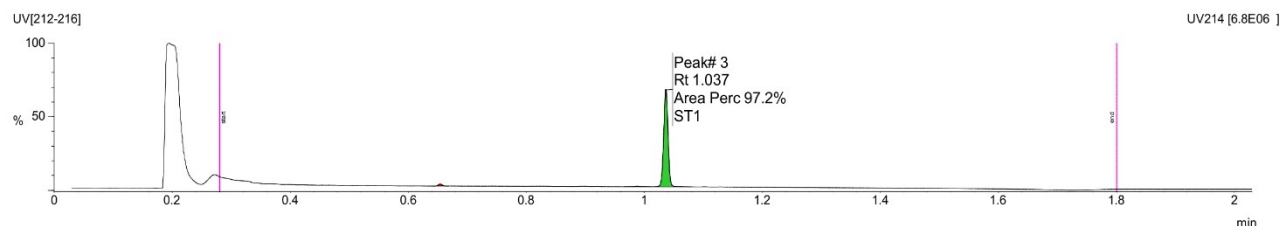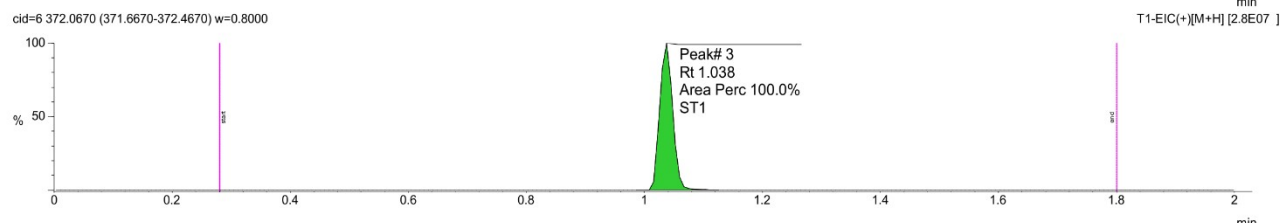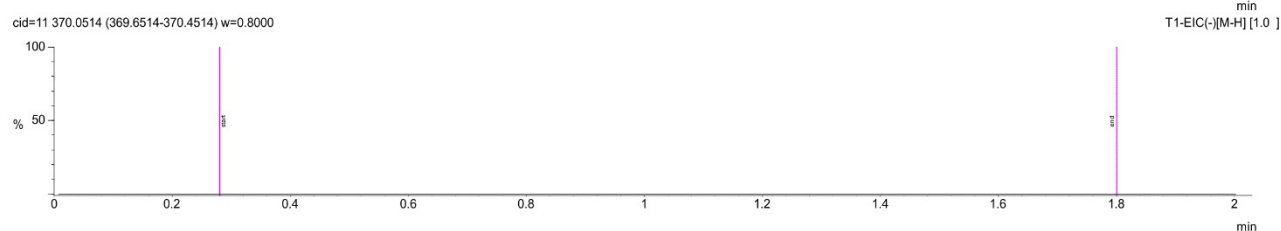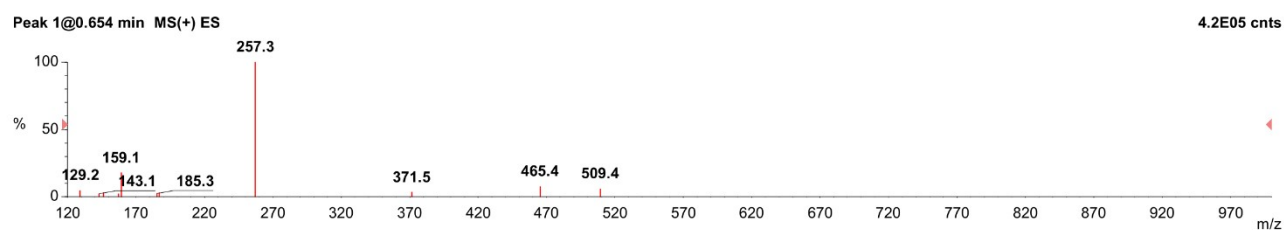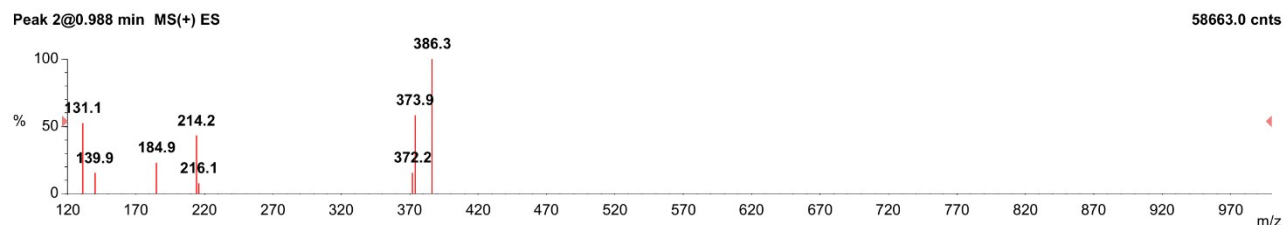

Printed: 10/6/2022 1:50 PM



## HTS QC Analysis Report

Sample Name: LCMS384-20221005-1\_I11

Compound 5

Instrument: ICHALW-DL00012-TQD

Acquisition time: 10/6/2022 12:17 AM

Peak 3@1.038 min MS(+) ES

1.9E07 cnts

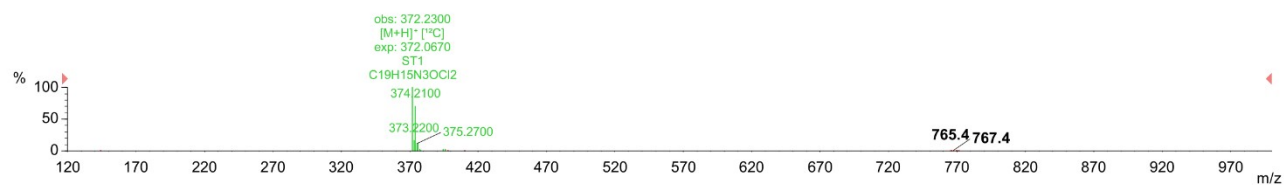

Printed: 10/6/2022 1:50 PM





## HTS QC Analysis Report

Sample Name: LCMS384-20221005-1\_I11

Compound 6

Instrument: ICHALW-DL00012-TQD

Acquisition time: 10/6/2022 12:17 AM  
Result

## Expression

Auto-Comments

Auto-Summary

Purity

Target Mass

Target RT

GOOD

97.2000

372.2000

1.0370

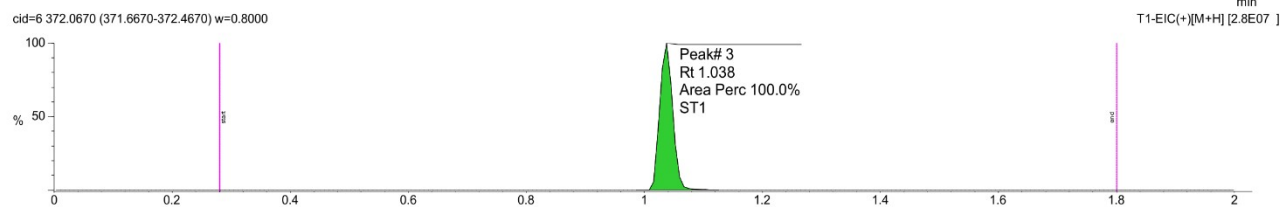

Printed: 10/6/2022 1:50 PM

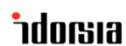

## HTS QC Analysis Report

Sample Name: LCMS384-20221005-1\_I11

Compound 6

Instrument: ICHALW-DL00012-TQD

Acquisition time: 10/6/2022 12:17 AM

Peak 3@1.038 min MS(+) ES

1.9E07 cnts

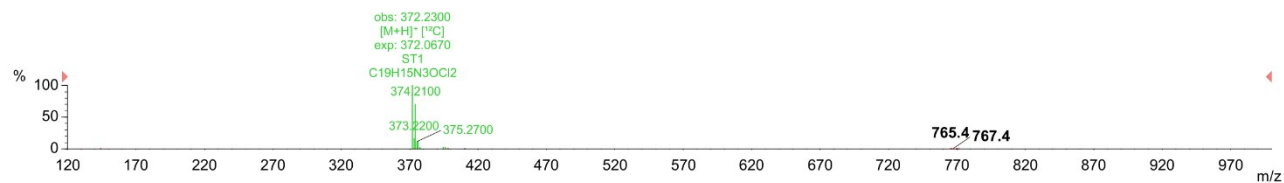

Printed: 10/6/2022 1:50 PM



## HTS QC Analysis Report

Sample Name: LCMS384-20220927-4\_M01

Compound 7

Instrument: ICHALW-DL00021-SQD

Acquisition time: 9/27/2022 1:46 PM

## Expression

## Result

Auto-Comments

GOOD

Auto-Summary

Purity

100.0000

Target Mass

315.4000

Target RT

0.6330

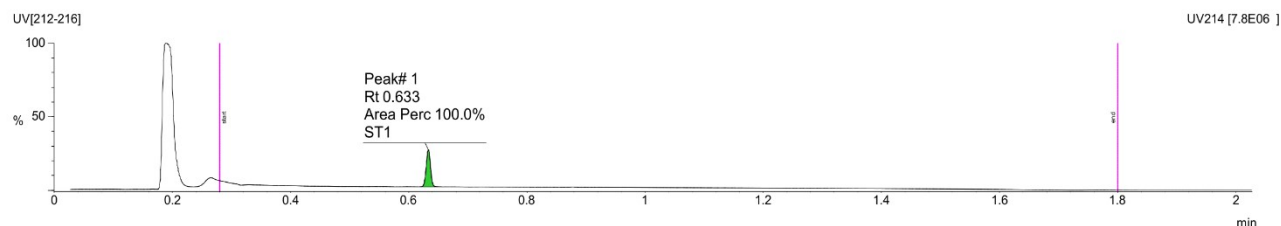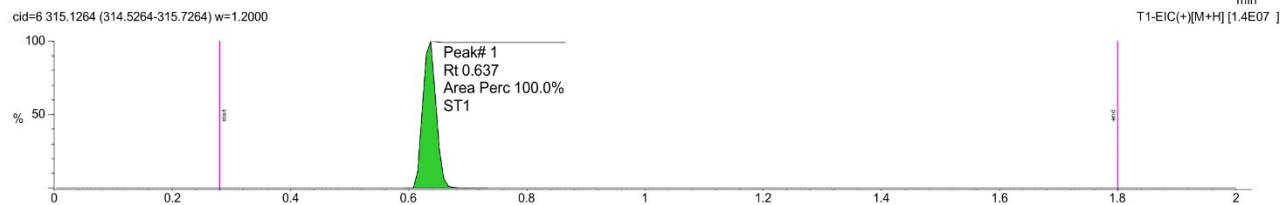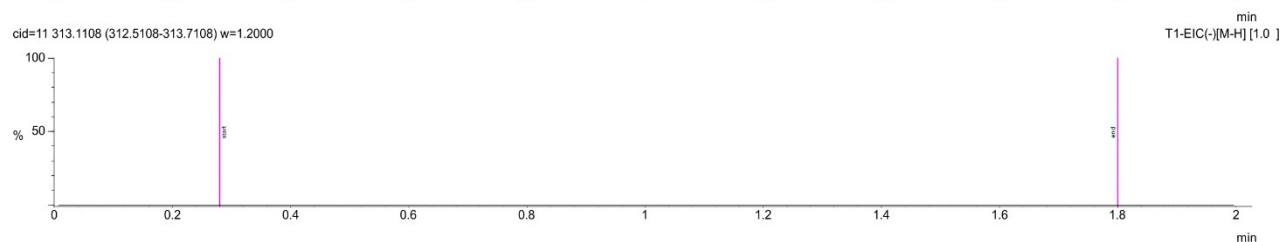

## Peak 1@0.637 min MS(+) ES

9.6E06 cnts

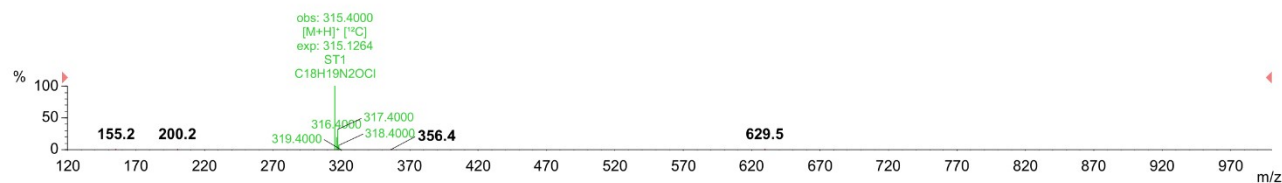

Printed: 9/28/2022 8:44 AM

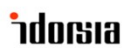

HTS QC Analysis Report

Sample Name: LCMS384-20220518-2\_C13

Compound 8

Instrument: ICHALW-DL00021-SQD

Acquisition time: 5/18/2022 4:55 PM

Expression

Auto-Comments

Auto-Summary

Purity

Target Mass

Target RT

Result

GOOD

97.7000

355.4000

0.5270

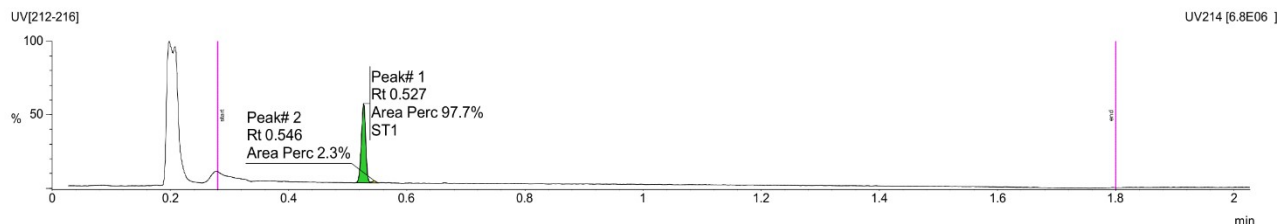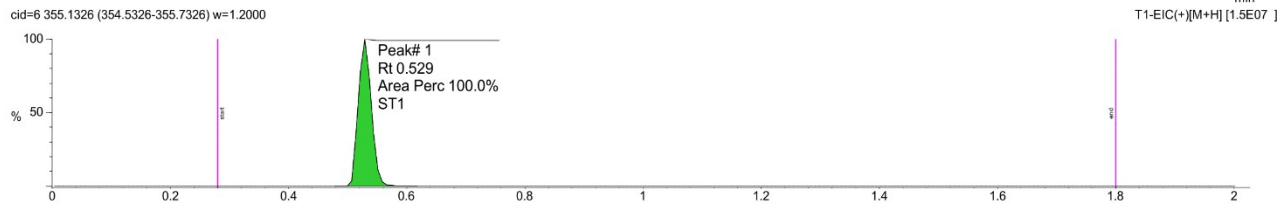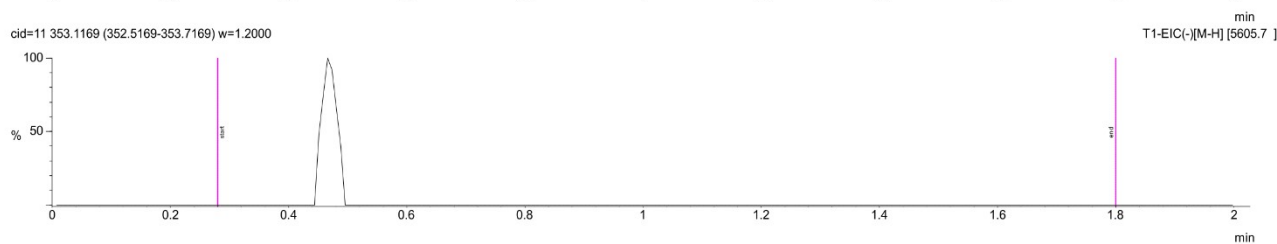

Peak 1@0.529 min MS(+) ES

9.8E06 cnts

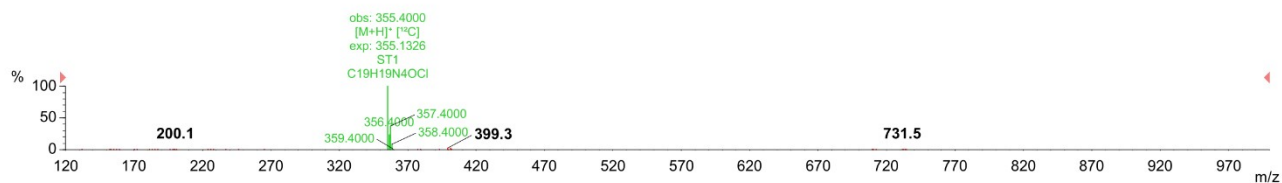

Peak 2@0.546 min MS(+) ES

4.0E06 cnts

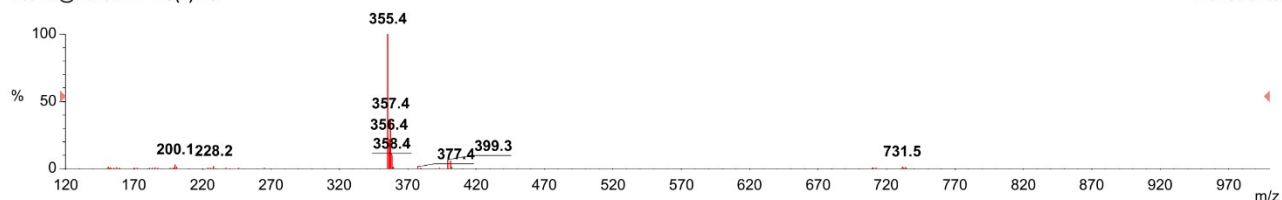

Printed: 5/19/2022 5:07 PM

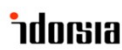

HTS QC Analysis Report

Sample Name: LCMS384-20220718-2\_G09

Compound 9  
Instrument: ICHALW-DL00021-SQD

Acquisition time: 7/18/2022 2:04 PM  
Result

Expression

Auto-Comments

Auto-Summary

Purity

Target Mass

Target RT

GOOD

98.2000

338.4000

0.9260

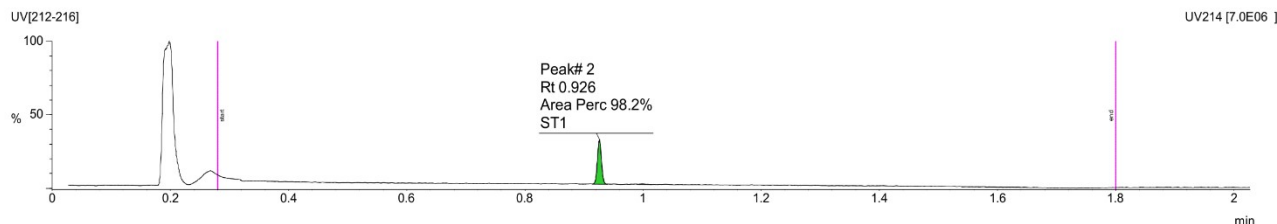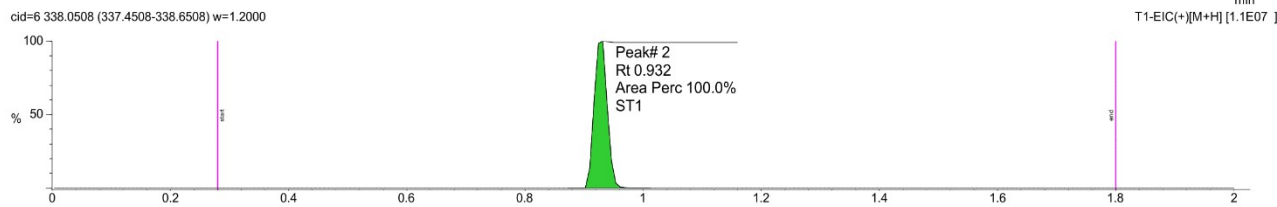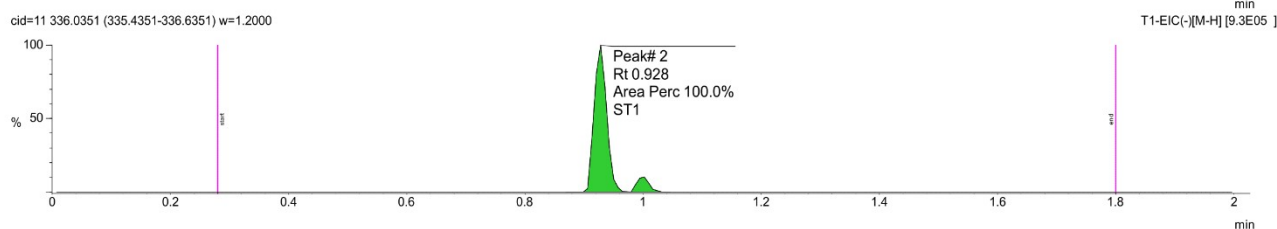

Peak 2@0.932 min MS(+) ES

6.5E06 cnts

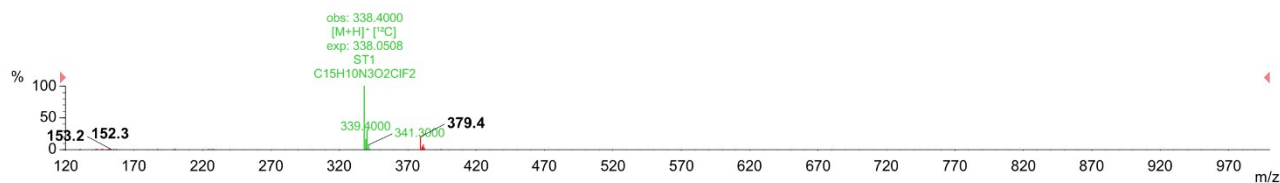

Peak 3@1.000 min MS(+) ES

6.7E05 cnts

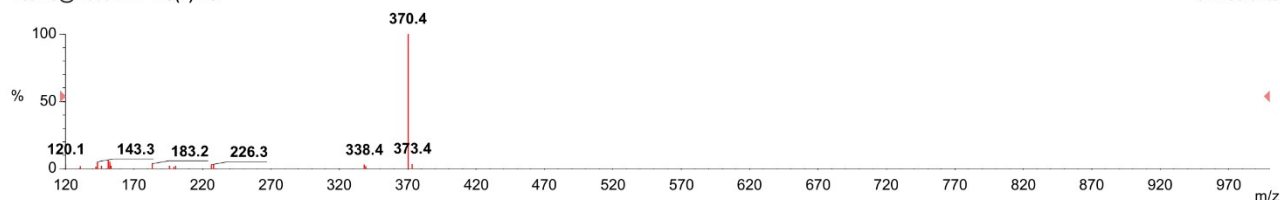

Printed: 7/18/2022 4:39 PM



## HTS QC Analysis Report

Sample Name: LCMS384-20220718-2\_E09

Compound 10

Instrument: ICHALW-DL00021-SQD

Acquisition time: 7/18/2022 2:01 PM

## Expression

## Result

Auto-Comments

GOOD

Auto-Summary

Purity

95.1000

Target Mass

321.3000

Target RT

0.7460

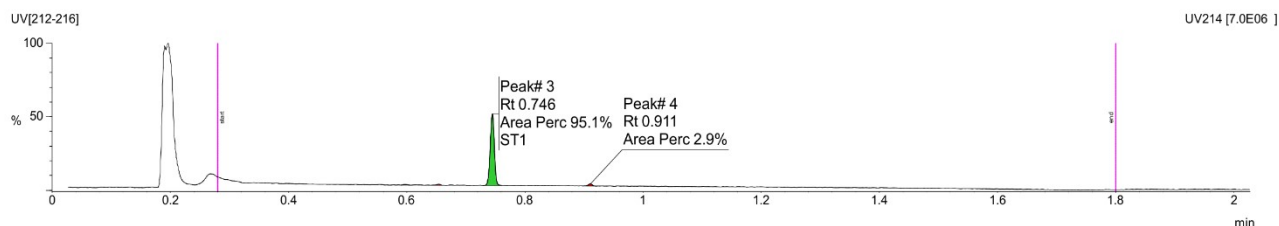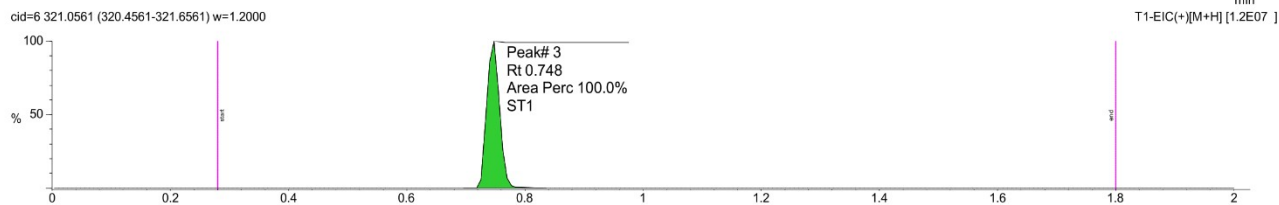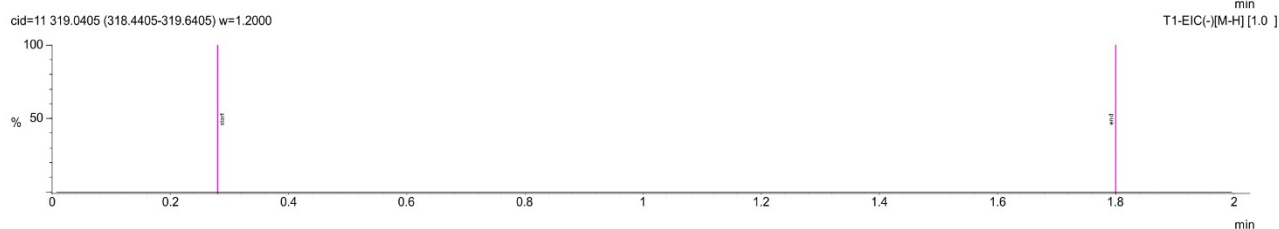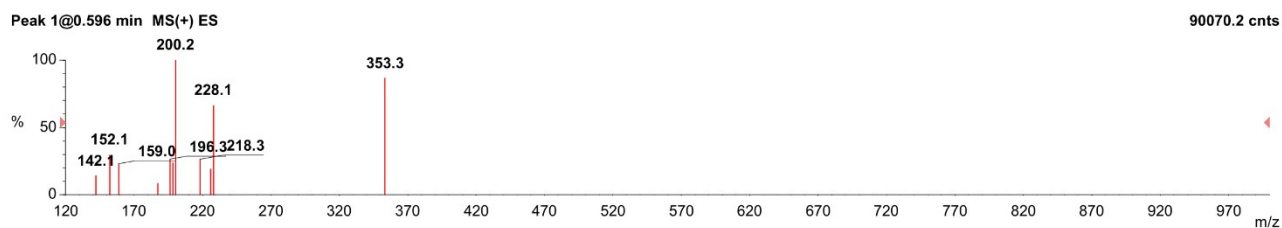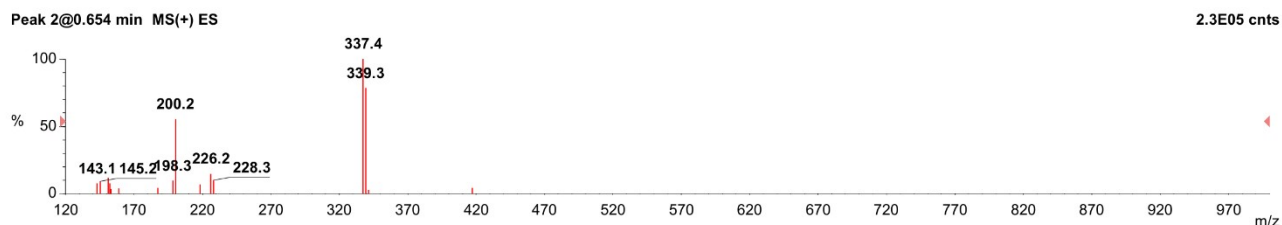

Printed: 7/18/2022 4:38 PM



## HTS QC Analysis Report

Sample Name: LCMS384-20220718-2\_E09

Compound 10

Instrument: ICHALW-DL00021-SQD

Acquisition time: 7/18/2022 2:01 PM

Peak 3@0.748 min MS(+) ES

7.7E06 cnts

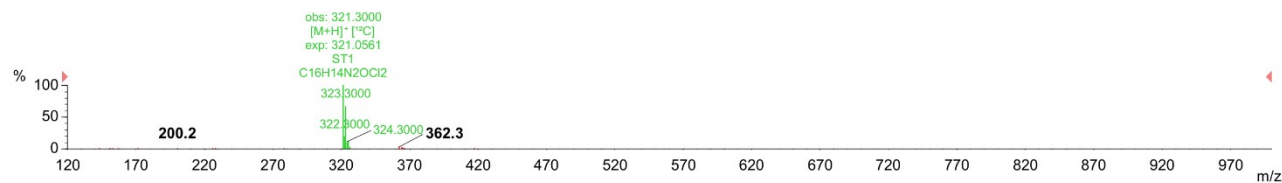

Peak 4@0.911 min MS(+) ES

93590.7 cnts

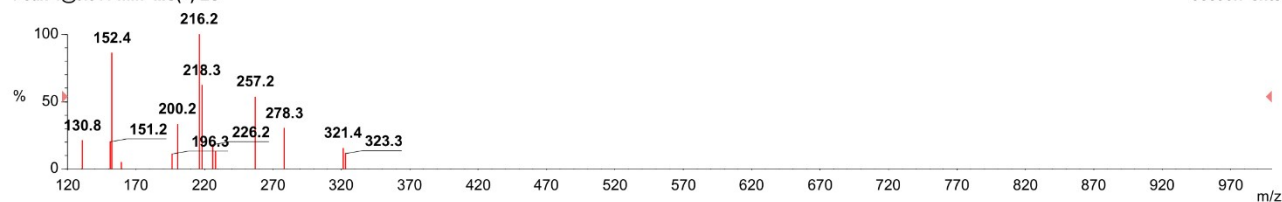

Printed: 7/18/2022 4:38 PM

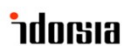

## HTS QC Analysis Report

Sample Name: LCMS384-20221011-4\_M05

**Compound 11**  
 Instrument: ICHALW-DL00012-TQD

 Acquisition time: 10/11/2022 3:46 PM  
**Result**

## Expression

Auto-Comments

Auto-Summary

Purity

Target Mass

Target RT

GOOD

97.7000

364.3000

0.5160

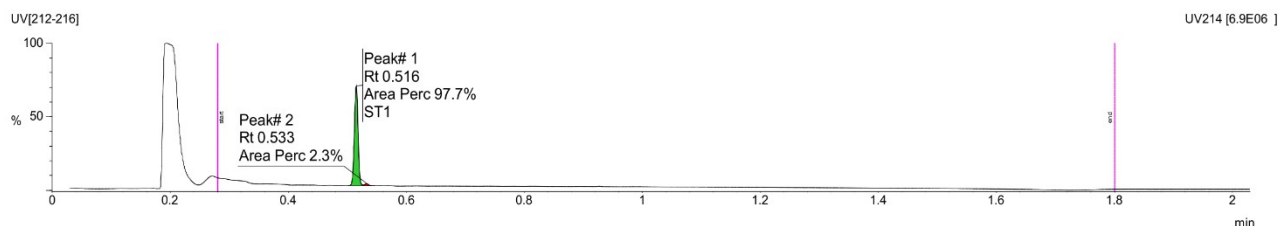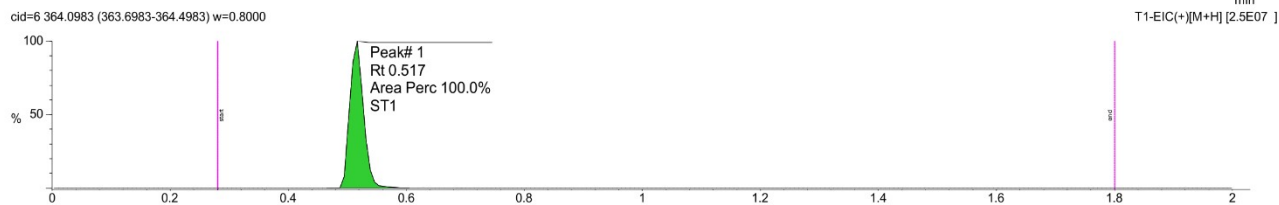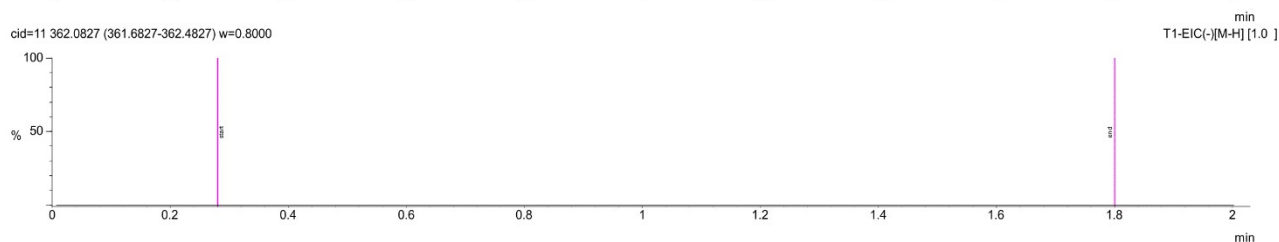

## Peak 1@0.517 min MS(+) ES

1.7E07 cnts

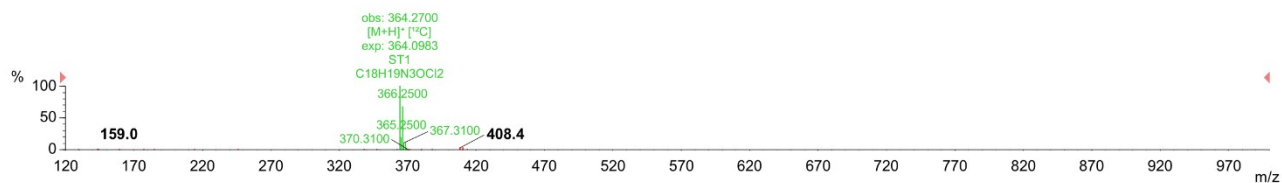

## Peak 2@0.533 min MS(+) ES

6.4E06 cnts

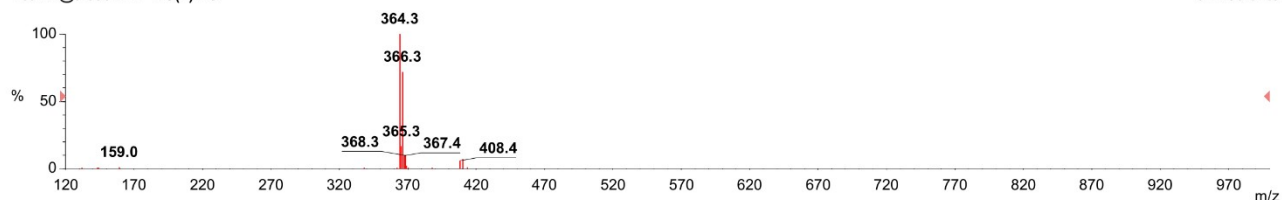

Printed: 10/12/2022 9:24 AM



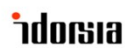

## HTS QC Analysis Report

Sample Name: LCMS384-20220822-2\_I05

Compound 12

Instrument: ICHALW-DL00012-TQD

Acquisition time: 8/22/2022 2:12 PM

## Expression

Auto-Comments

Auto-Summary

Purity

Target Mass

Target RT

## Result

GOOD

91.6000

335.2000

0.7380

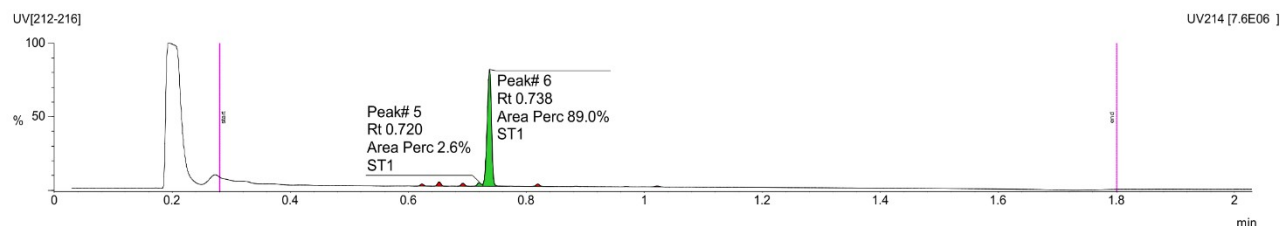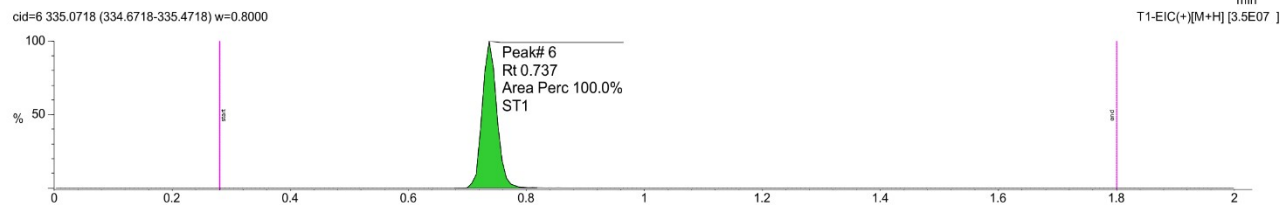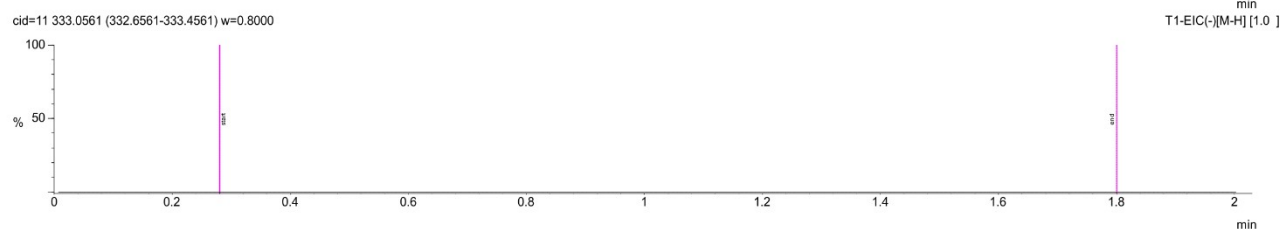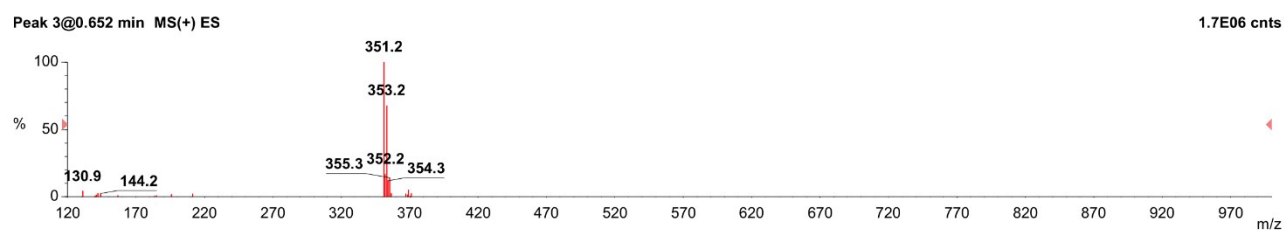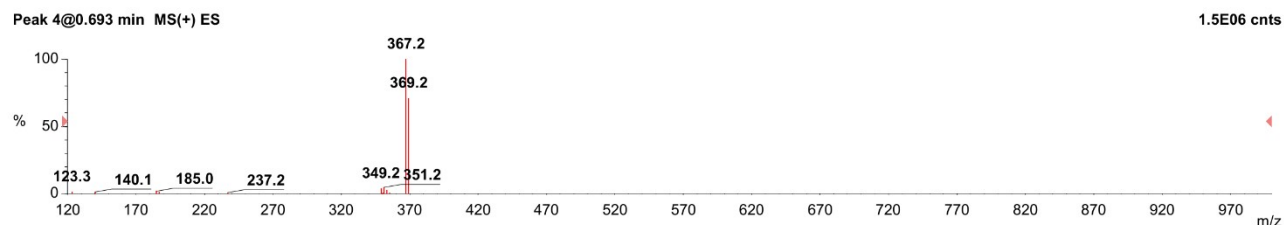

Printed: 8/23/2022 11:49 AM



## HTS QC Analysis Report

Sample Name: LCMS384-20220822-2\_I05

Compound 12

Instrument: ICHALW-DL00012-TQD

Acquisition time: 8/22/2022 2:12 PM

Peak 5@0.720 min MS(+) ES

1.1E07 cnts

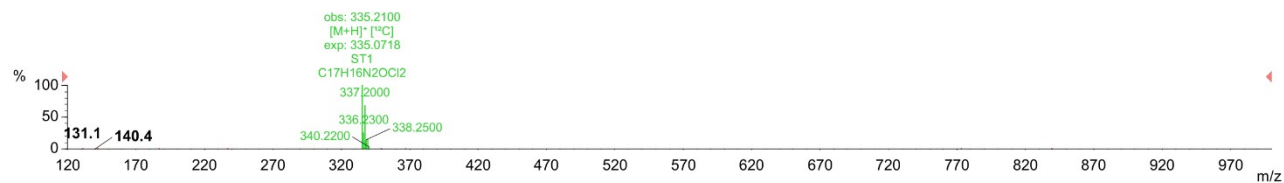

Peak 6@0.737 min MS(+) ES

2.5E07 cnts

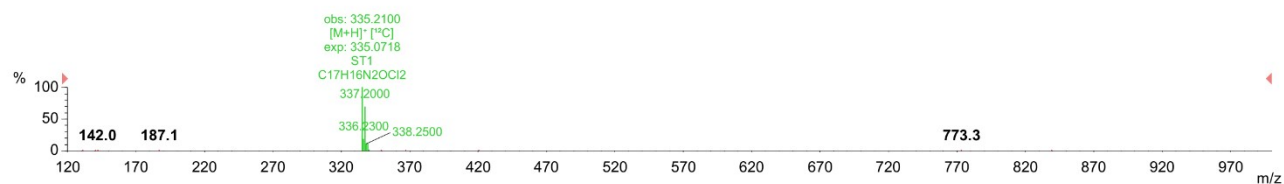

Printed: 8/23/2022 11:49 AM



## HTS QC Analysis Report

Sample Name: LCMS384-20230119-3\_G03

Compound 13

Instrument: ICHALW-DL00012-TQD

Acquisition time: 1/20/2023 9:38 AM  
Result

## Expression

Auto-Comments

Auto-Summary

Purity

Target Mass

Target RT

GOOD

97.6000

352.2000

0.6160

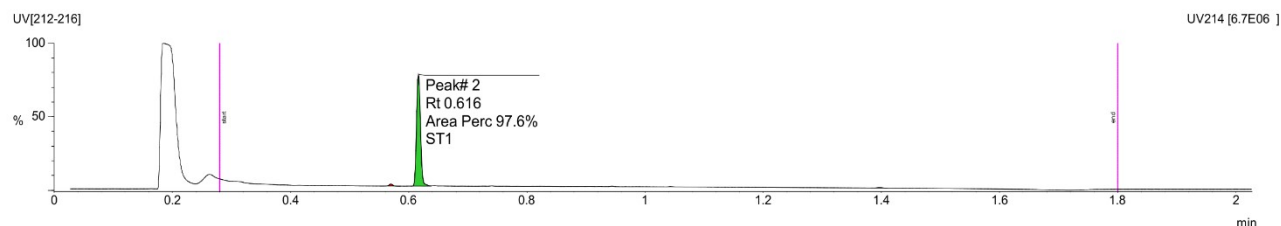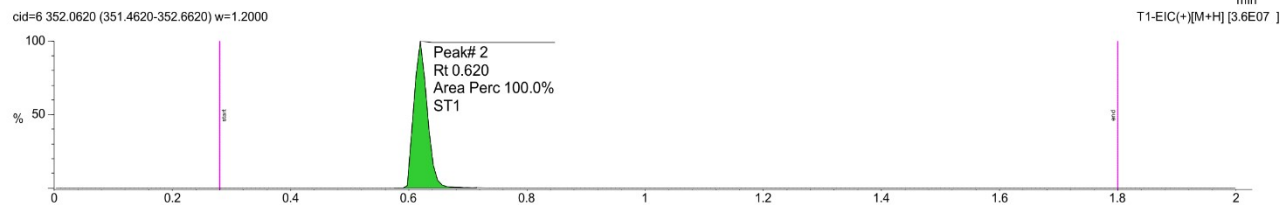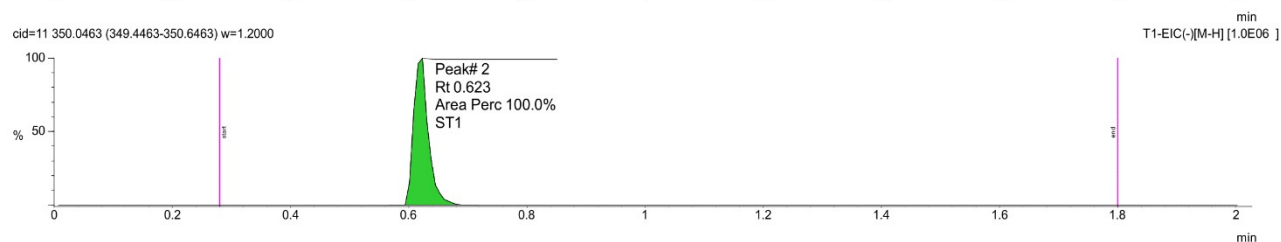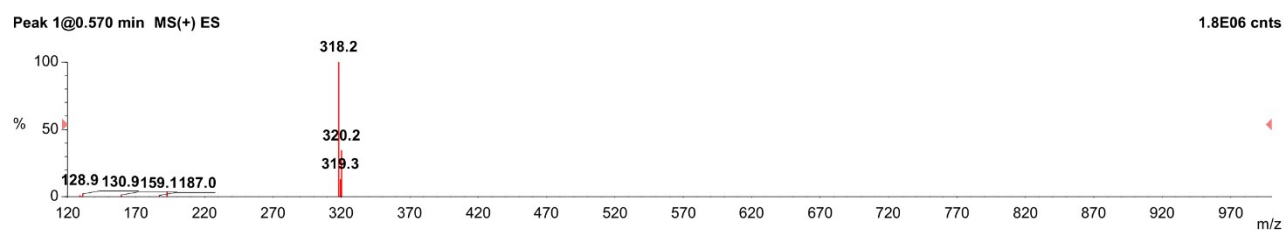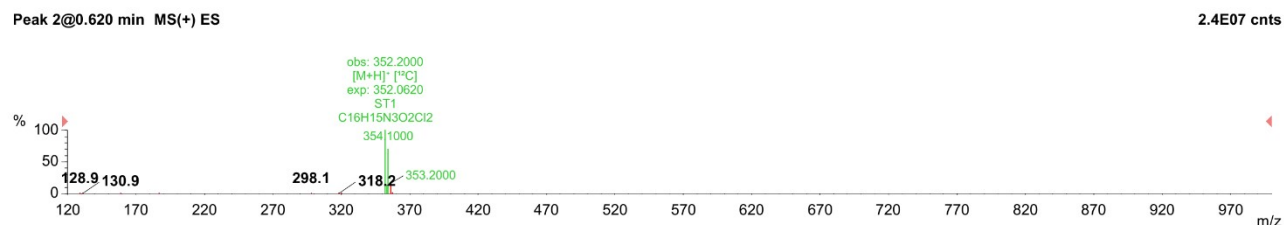

Printed: 1/20/2023 2:50 PM



## HTS QC Analysis Report

Sample Name: LCMS384-20220530-2\_G03

Compound 14

Instrument: ICHALW-DL00012-TQD

Acquisition time: 5/30/2022 7:58 PM

## Expression

## Result

Auto-Comments

GOOD

Auto-Summary

99.2000

Purity

Target Mass

390.2000

Target RT

1.1040

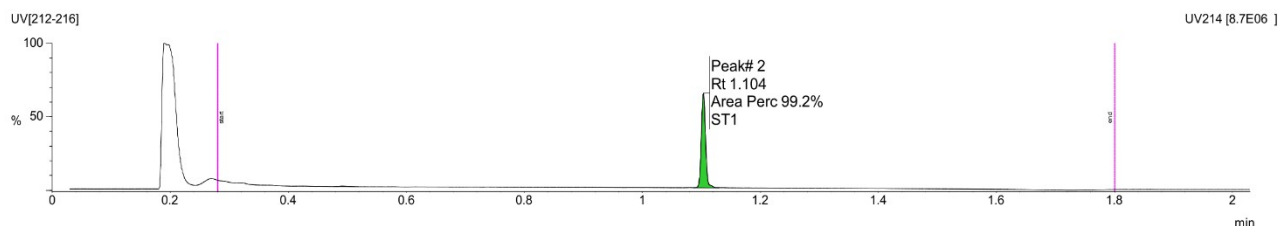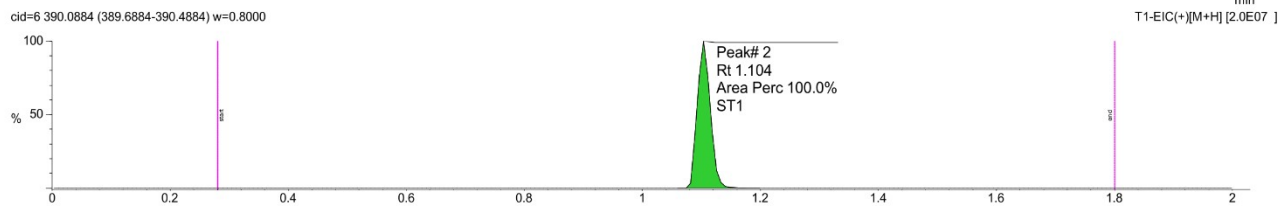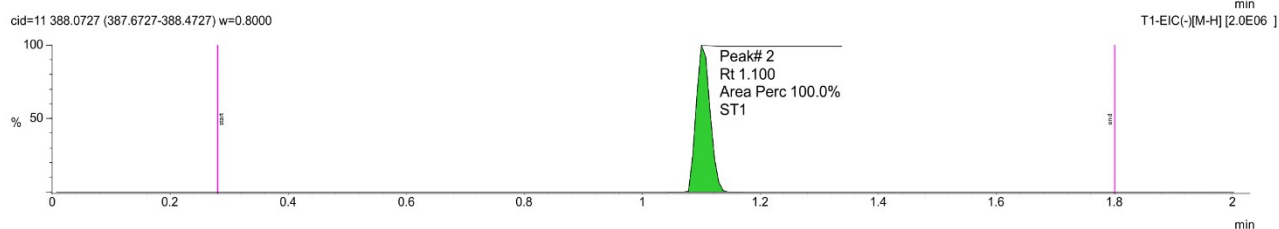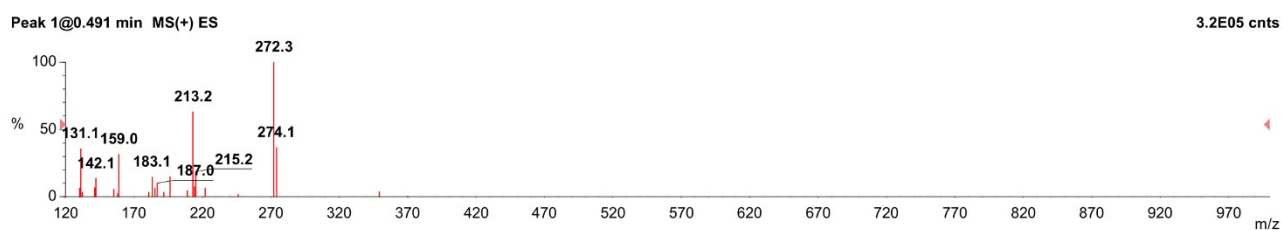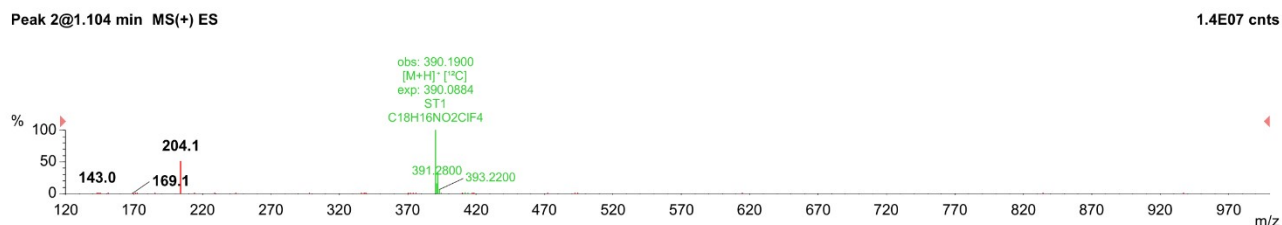

Printed: 5/31/2022 9:41 AM



## HTS QC Analysis Report

Sample Name: LCMS384-20220530-2\_K01

Compound 15

Instrument: ICHALW-DL00012-TQD

Acquisition time: 5/30/2022 7:41 PM

## Expression

## Result

Auto-Comments

GOOD

Auto-Summary

Purity

100.0000

Target Mass

397.1000

Target RT

1.0430

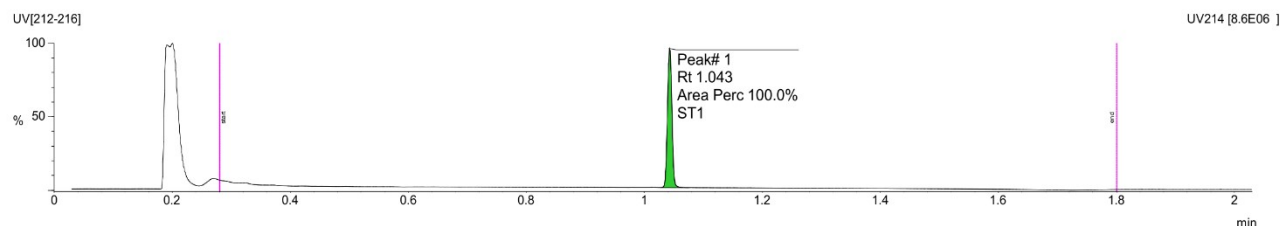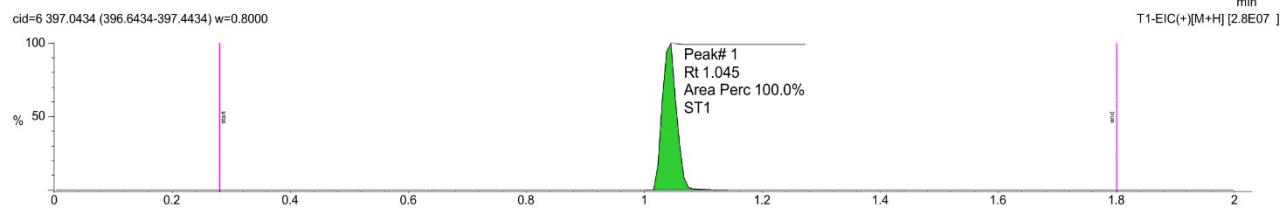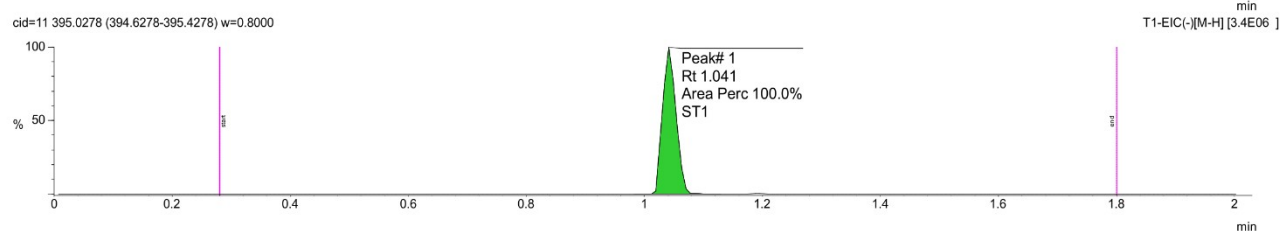

## Peak 1@1.045 min MS(+) ES

2.1E07 cnts

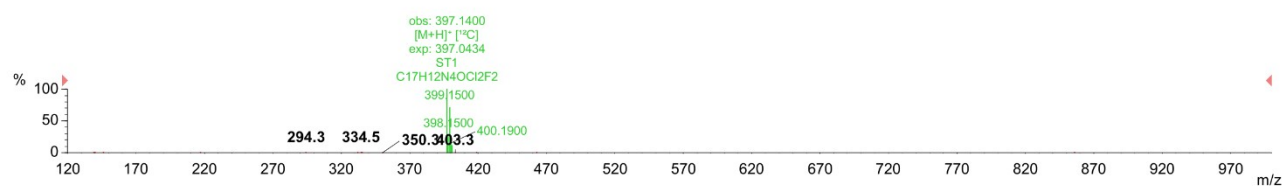

Printed: 5/31/2022 9:41 AM



## HTS QC Analysis Report

Sample Name: LCMS384-20221005-1\_G11

Compound 16

Instrument: ICHALW-DL00012-TQD

Acquisition time: 10/6/2022 12:14 AM

## Expression

Auto-Comments

Auto-Summary

Purity

Target Mass

Target RT

## Result

GOOD

94.9000

433.3000

1.1260

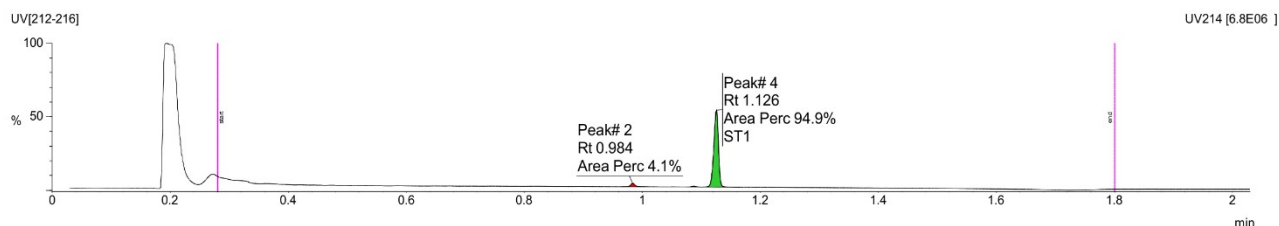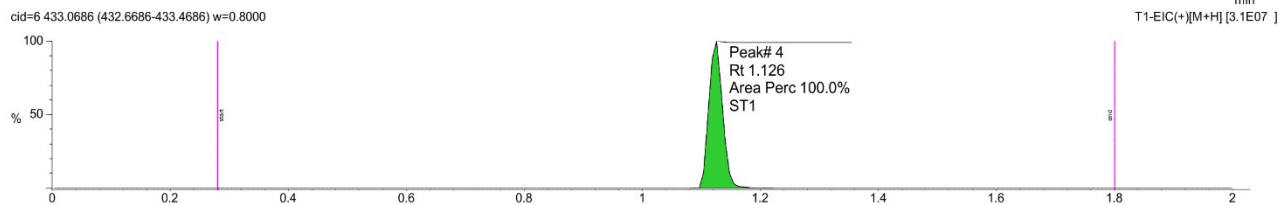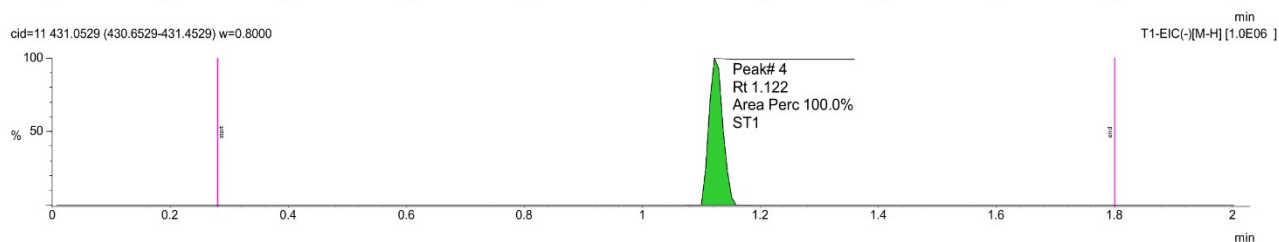

## Peak 1@0.333 min MS(+) ES

1.9E05 cnts

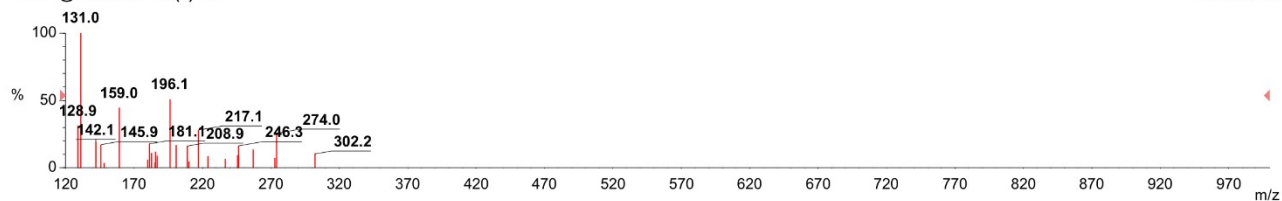

## Peak 2@0.984 min MS(+) ES

2.0E06 cnts

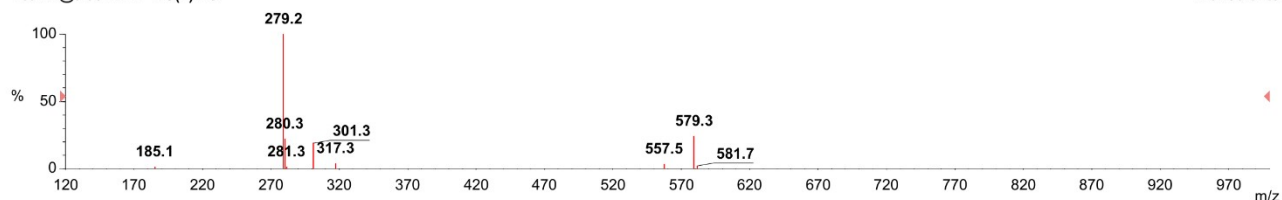

Printed: 10/6/2022 1:49 PM



## HTS QC Analysis Report

Sample Name: LCMS384-20221005-1\_G11

Compound 16

Instrument: ICHALW-DL00012-TQD

Acquisition time: 10/6/2022 12:14 AM

Peak 3@1.087 min MS(+) ES

74956.8 cnts

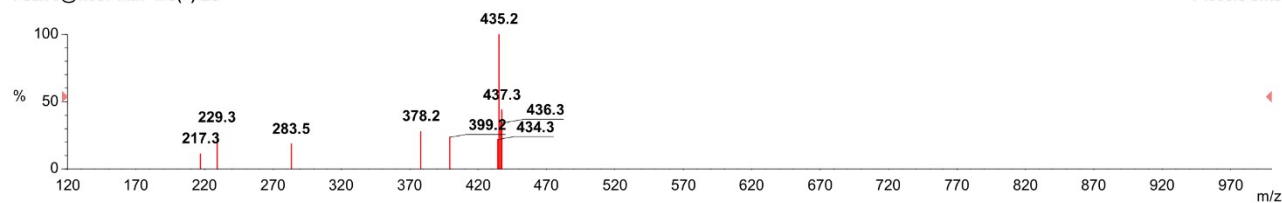

Peak 4@1.126 min MS(+) ES

2.2E07 cnts

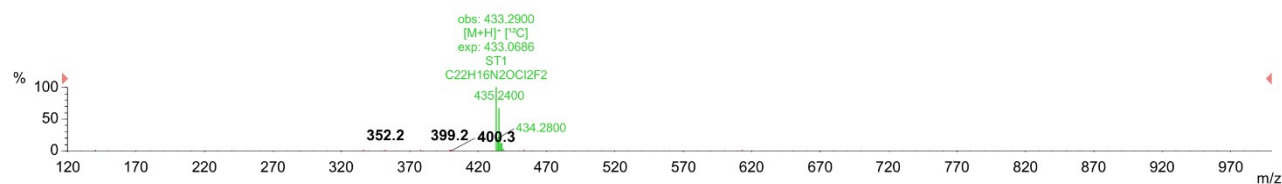

Printed: 10/6/2022 1:49 PM



HTS QC Analysis Report

Sample Name: LCMS384-20221005-1\_A13

Compound 17  
Instrument: ICHALW-DL00012-TQD

Acquisition time: 10/6/2022 12:29 AM  
Result

Expression

Auto-Comments

Auto-Summary

Purity

Target Mass

Target RT

GOOD

99.1000

357.2000

0.8540

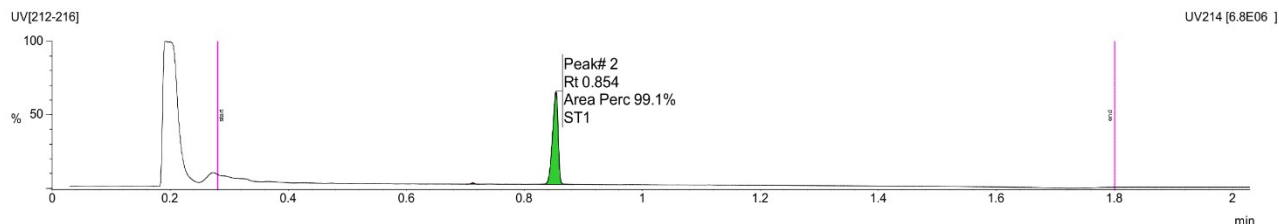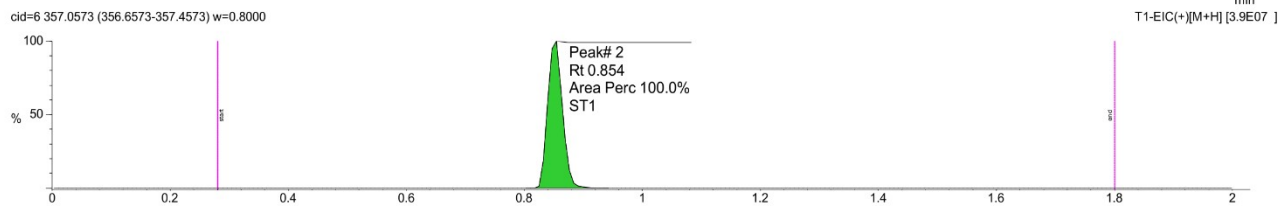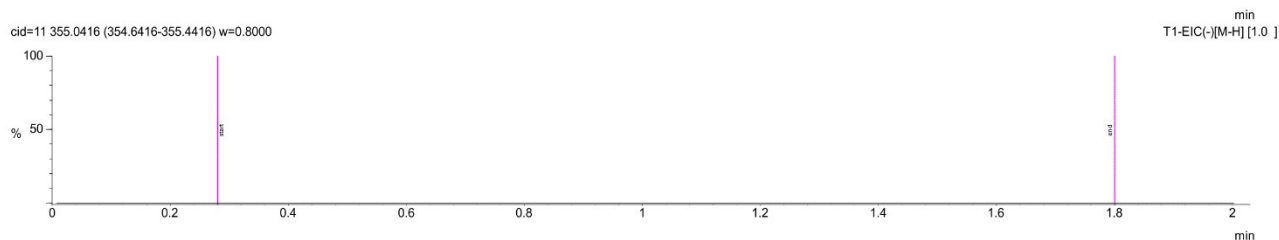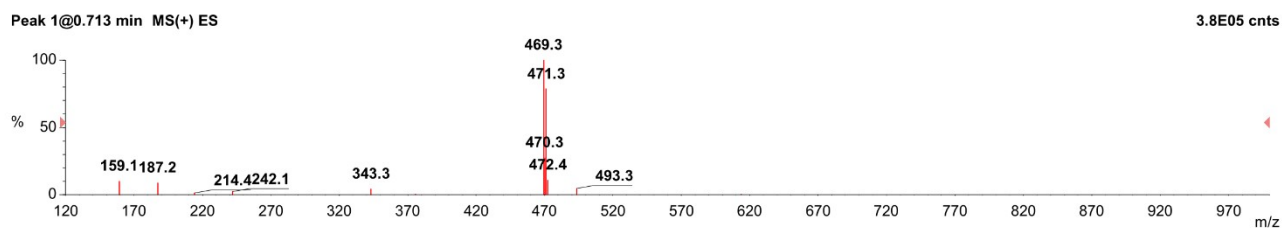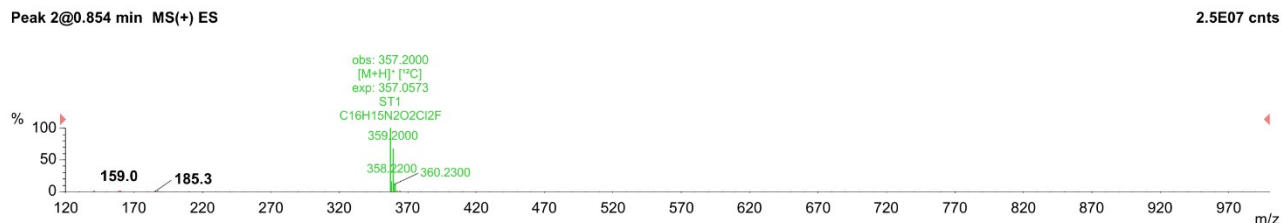

Printed: 10/6/2022 1:49 PM



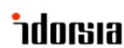

## HTS QC Analysis Report

Sample Name: LCMS384-20221005-1\_G13

Compound 18

Instrument: ICHALW-DL00012-TQD

Acquisition time: 10/6/2022 12:38 AM

## Expression

## Result

Auto-Comments

GOOD

Auto-Summary

Purity

97.9000

Target Mass

354.2000

Target RT

0.5260

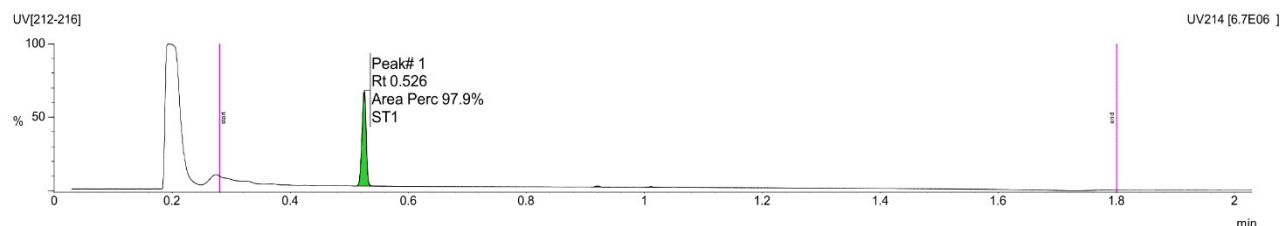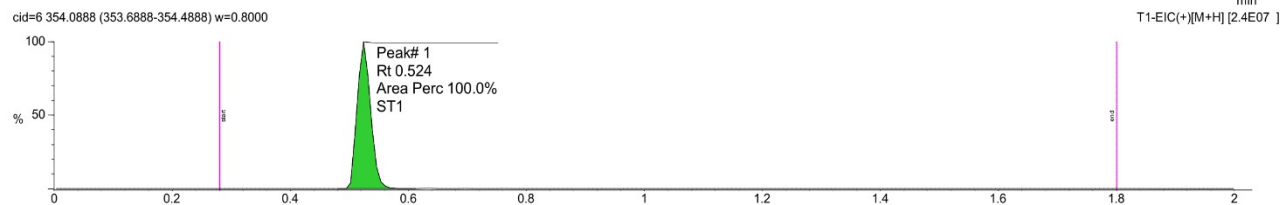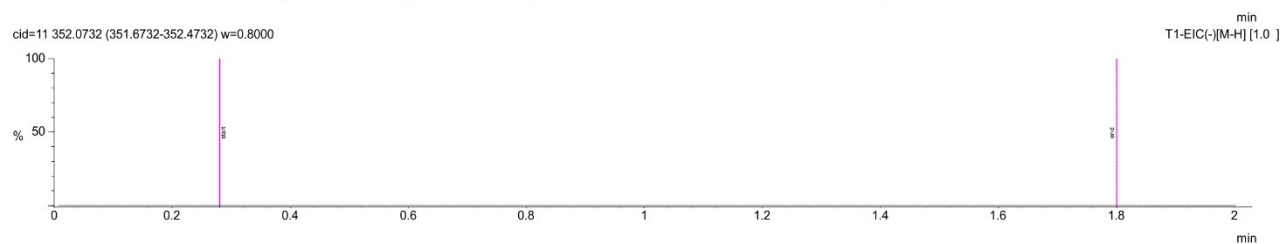

## Peak 1@0.524 min MS(+) ES

1.6E07 cnts

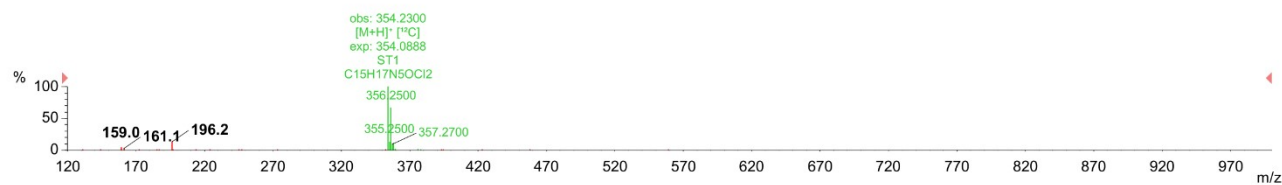

## Peak 2@0.737 min MS(+) ES

58913.9 cnts

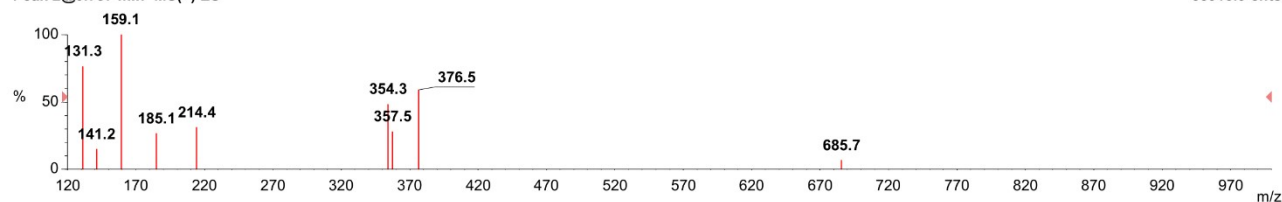

Printed: 10/6/2022 1:48 PM

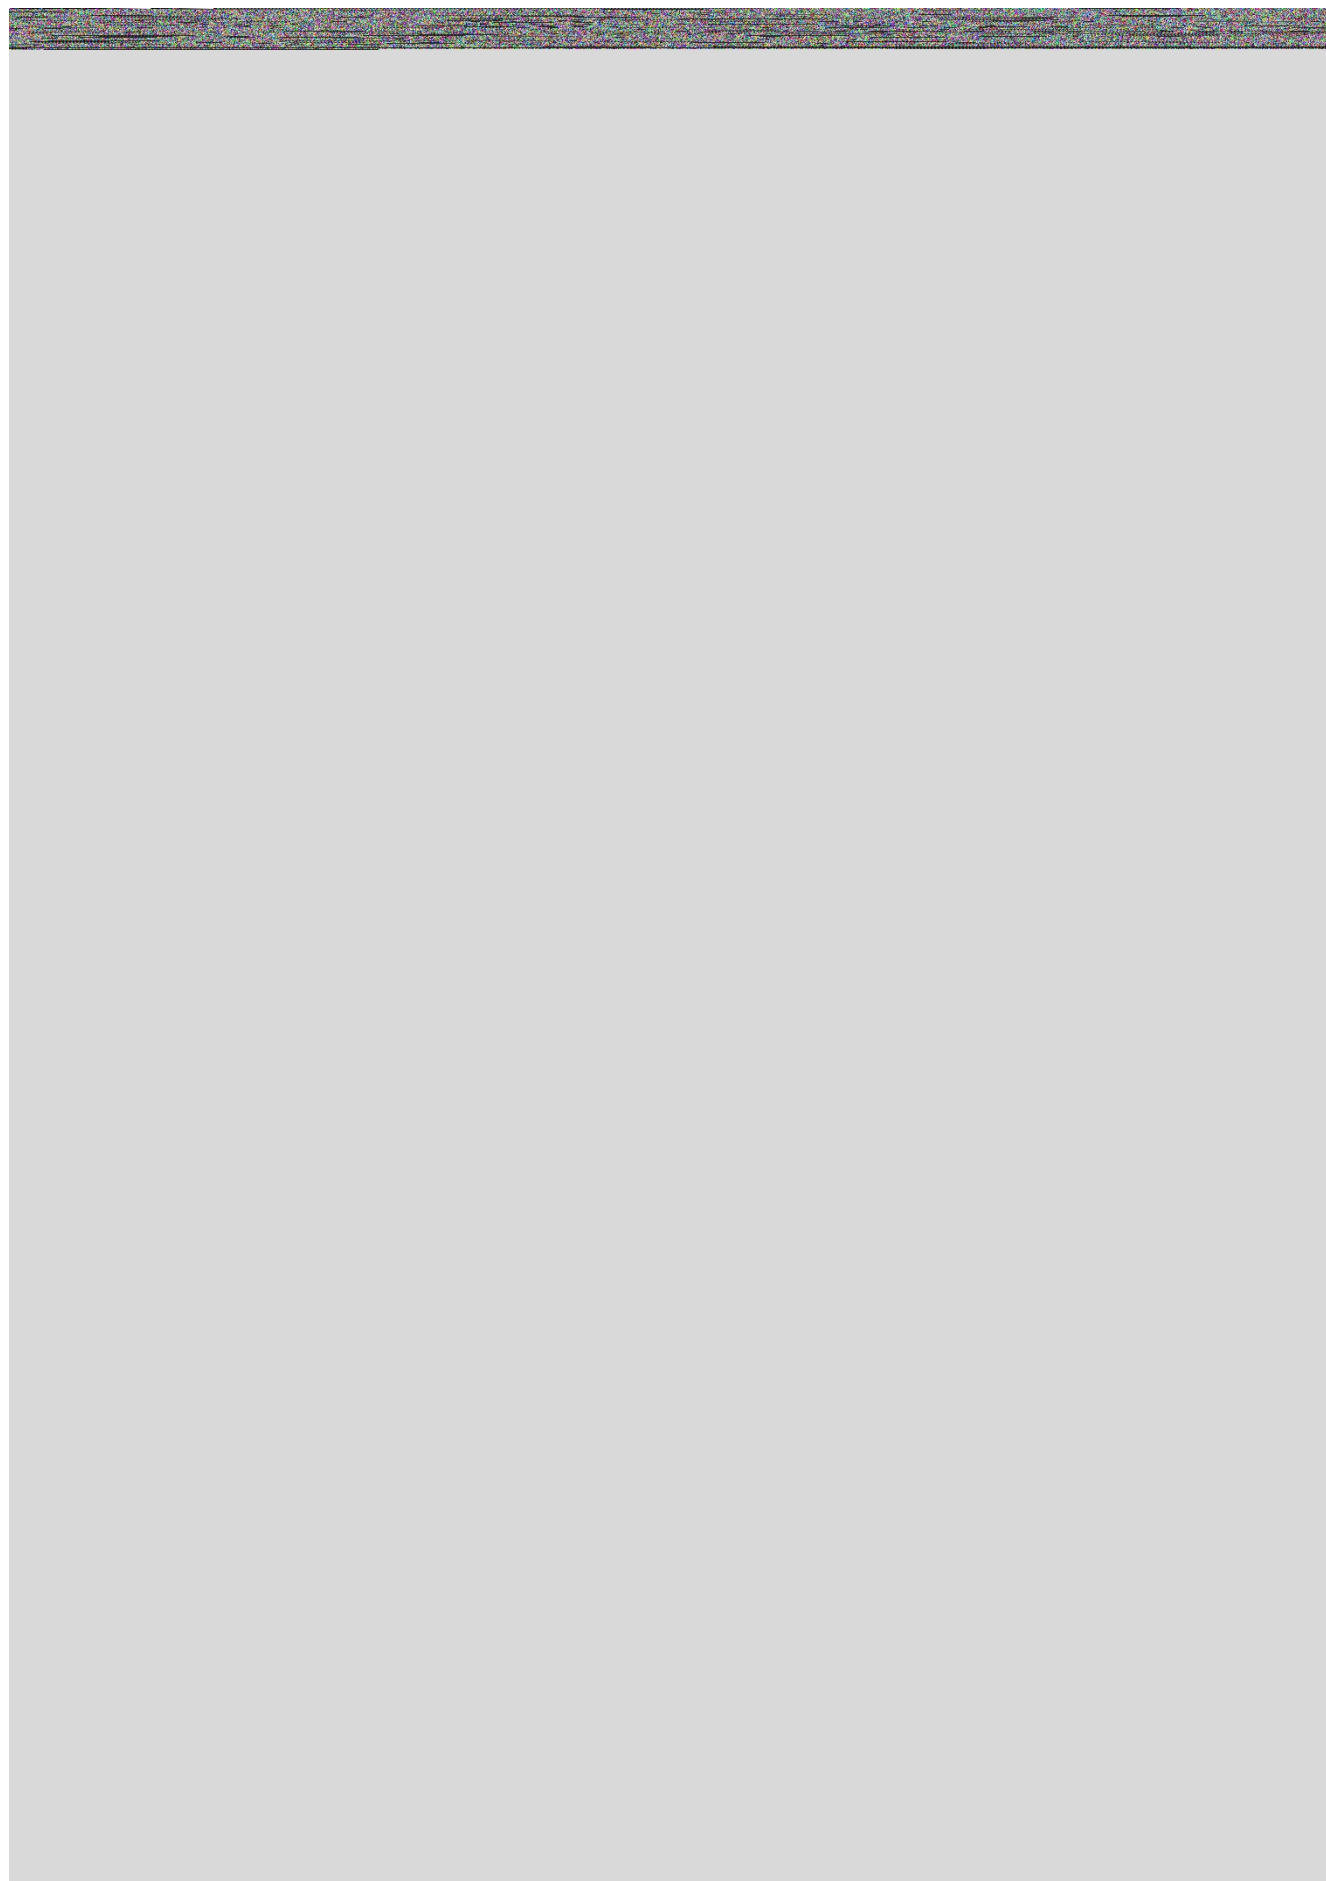



## HTS QC Analysis Report

Sample Name: LCMS384-20221005-1\_I13

Compound 19

Instrument: ICHALW-DL00012-TQD

Acquisition time: 10/6/2022 12:41 AM

## Expression

Auto-Comments

Auto-Summary

Purity

Target Mass

Target RT

## Result

GOOD

97.4000

286.2000

0.8540

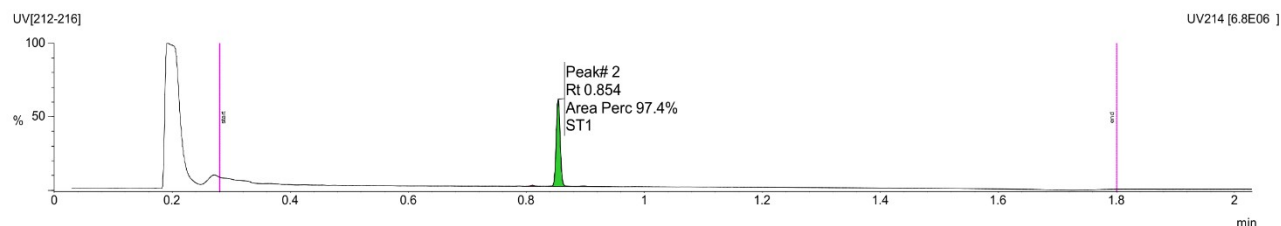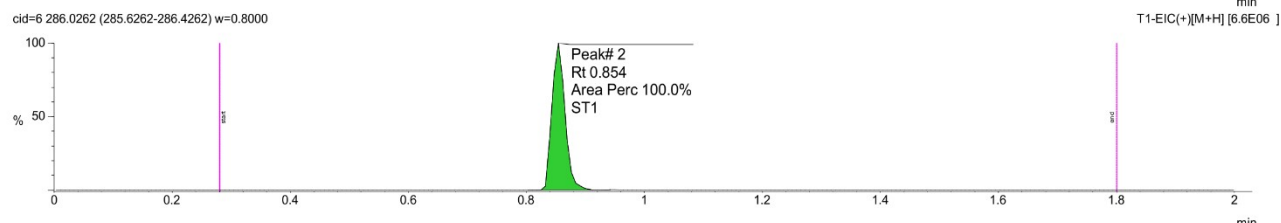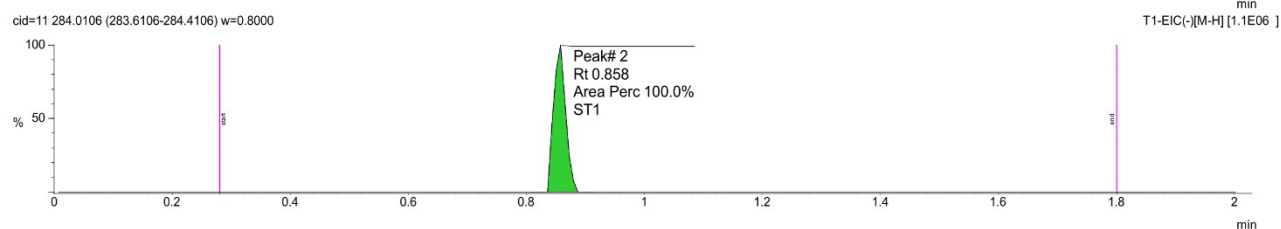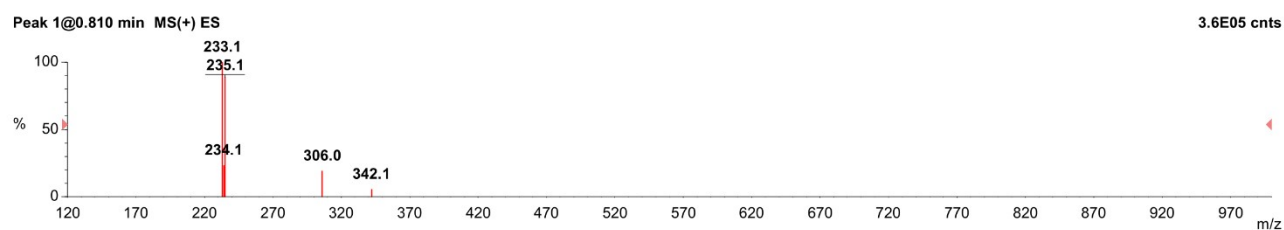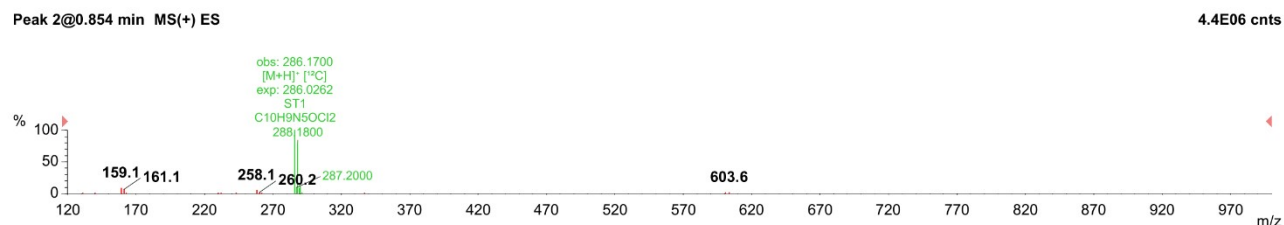

Printed: 10/6/2022 1:48 PM



### HTS QC Analysis Report

Sample Name: LCMS384-20221005-1\_K11

Compound 20

Instrument: ICHALW-DL00012-TQD

Acquisition time: 10/6/2022 12:20 AM  
Result

#### Expression

Auto-Comments

Auto-Summary

Purity

Target Mass

Target RT

GOOD

98.2000

325.2000

0.9660

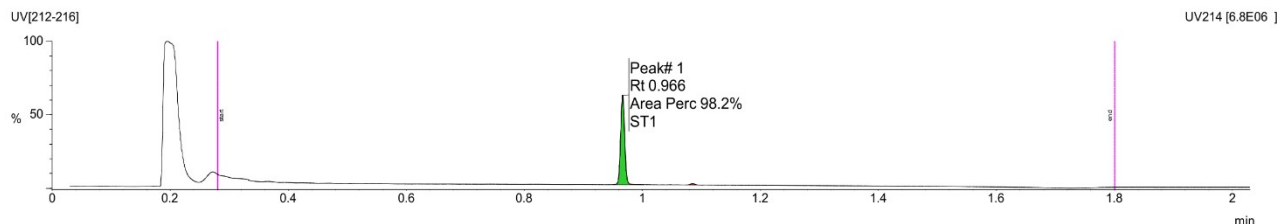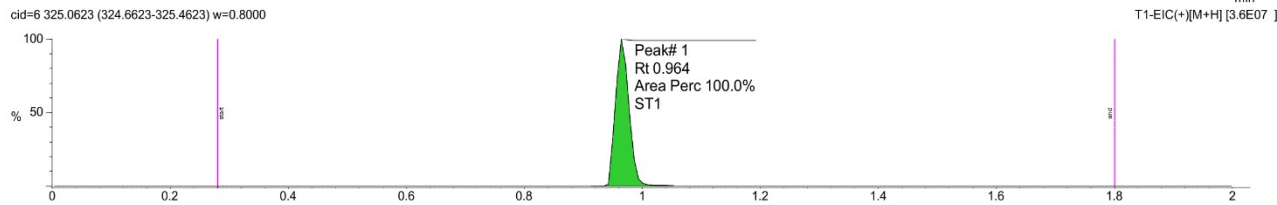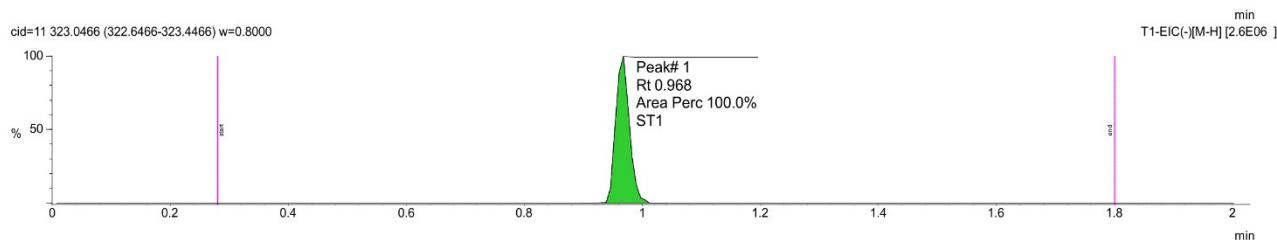

#### Peak 1@0.964 min MS(+) ES

2.5E07 cnts

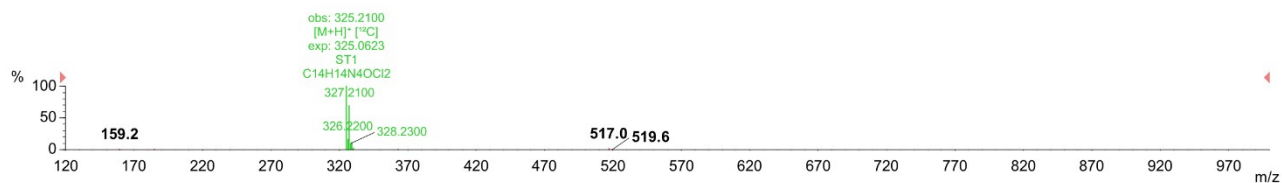

#### Peak 2@1.086 min MS(+) ES

2.2E05 cnts

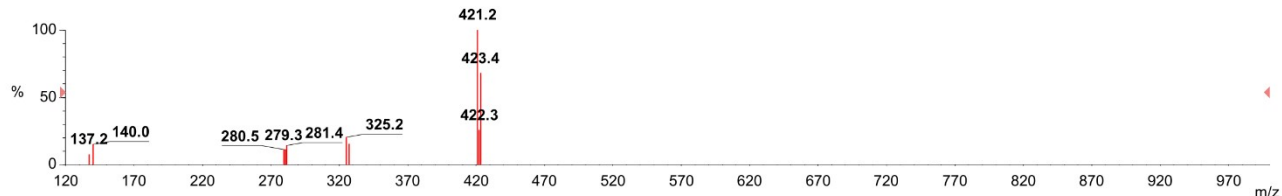

Printed: 10/6/2022 1:49 PM



## HTS QC Analysis Report

Sample Name: LCMS384-20221020-3\_I07

Compound 21

Instrument: ICHALW-DL00021-SQD

Acquisition time: 10/20/2022 4:14 PM  
Result

## Expression

Auto-Comments

Auto-Summary

Purity

Target Mass

Target RT

GOOD

98.9000

354.4000

0.6700

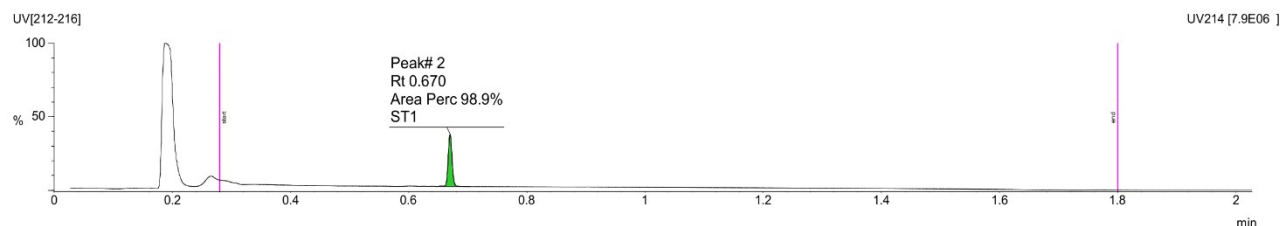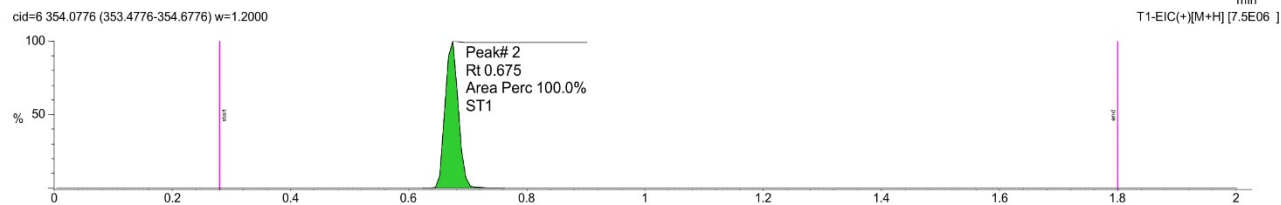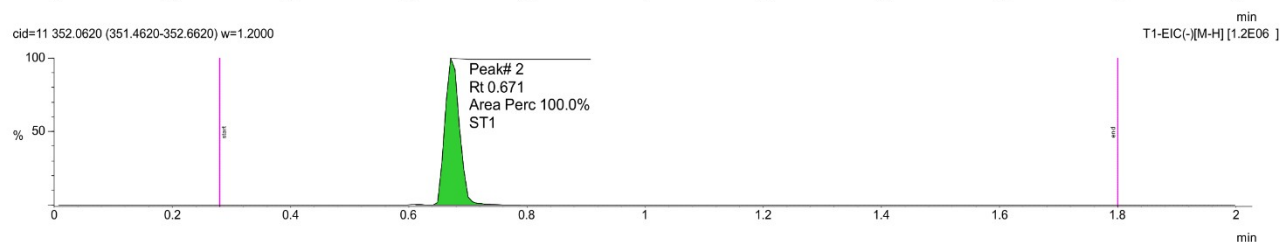

## Peak 1@0.656 min MS(+) ES

1.1E06 cnts

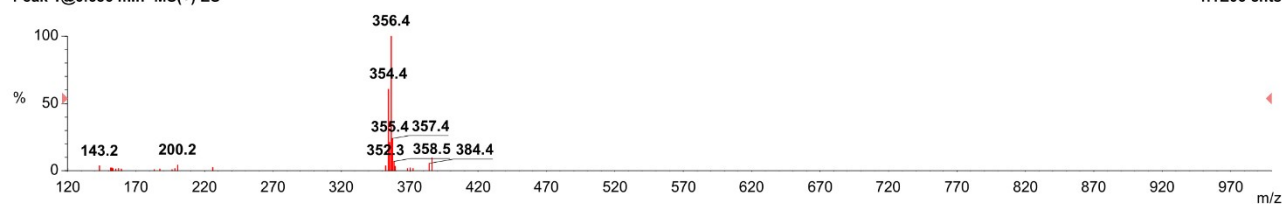

## Peak 2@0.675 min MS(+) ES

5.2E06 cnts

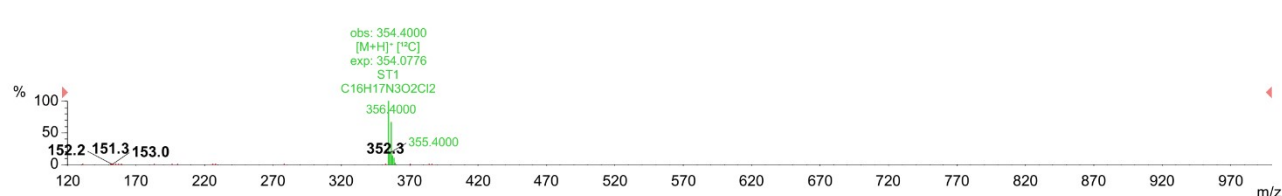

Printed: 10/21/2022 9:40 AM



## HTS QC Analysis Report

Sample Name: LCMS384-20221109-4\_K01

## Compound 22

Instrument: ICHALW-DL00012-TQD

Acquisition time: 11/9/2022 3:51 PM

## Expression

Auto-Comments

Auto-Summary

Purity

Target Mass

Target RT

## Result

GOOD

91.3000

299.2000

0.6560

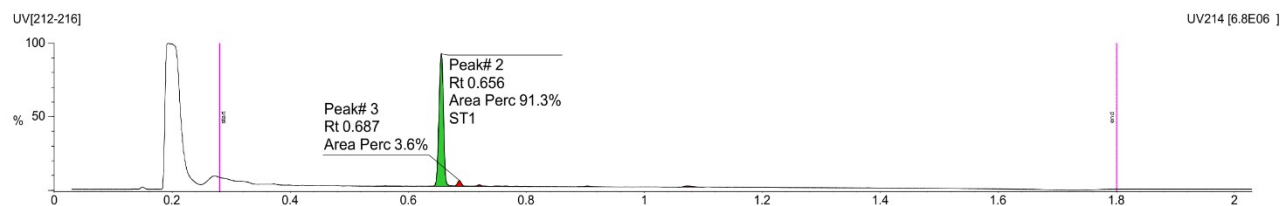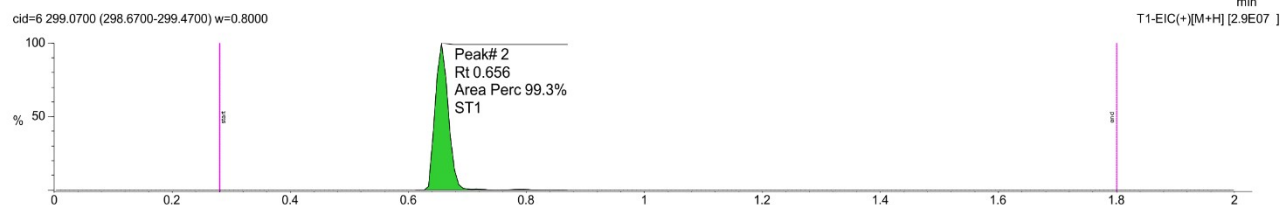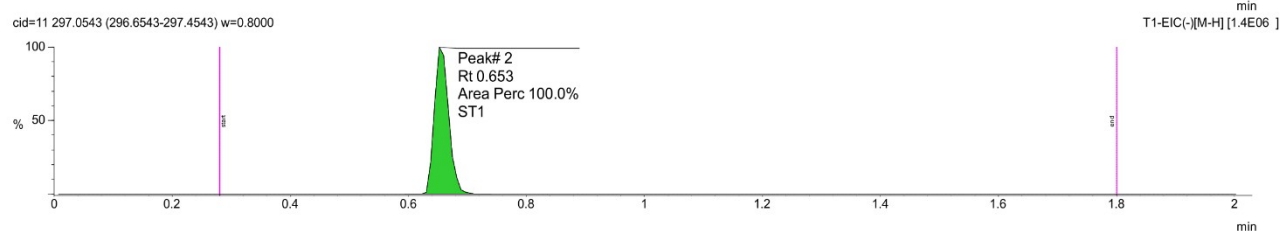

## Peak 2@0.687 min MS(+) ES

1.1E06 cnts

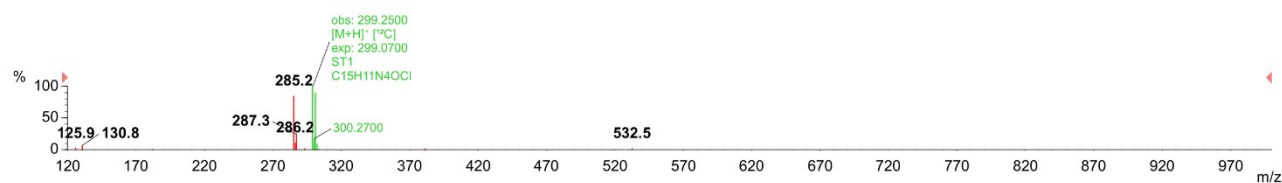

## Peak 3@0.687 min MS(+) ES

1.1E06 cnts

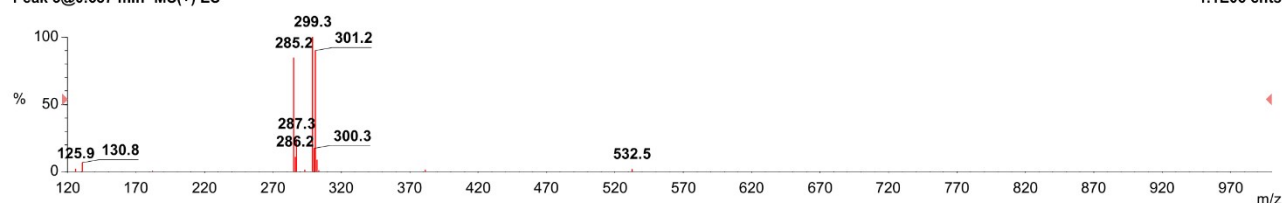

Printed: 11/10/2022 8:45 AM

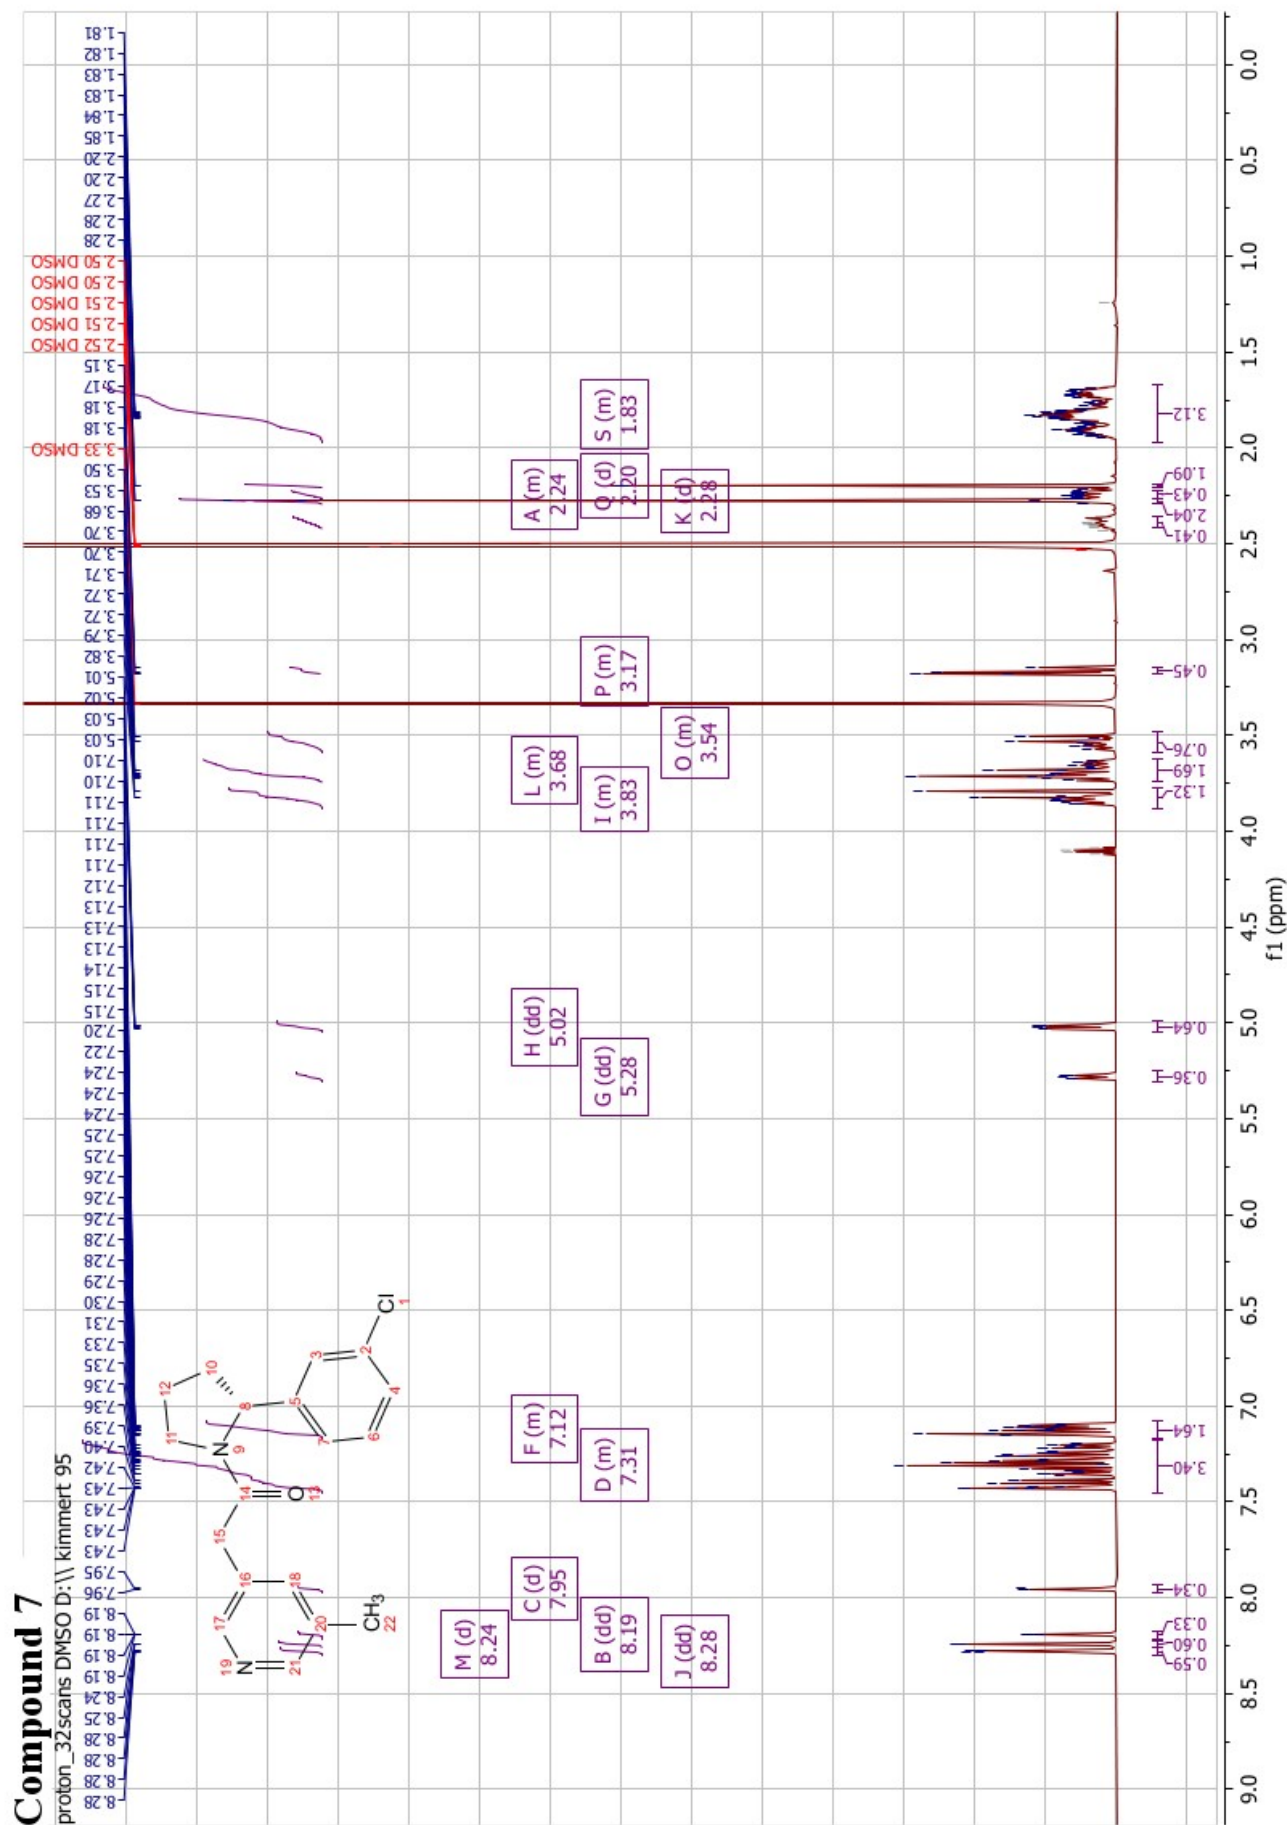

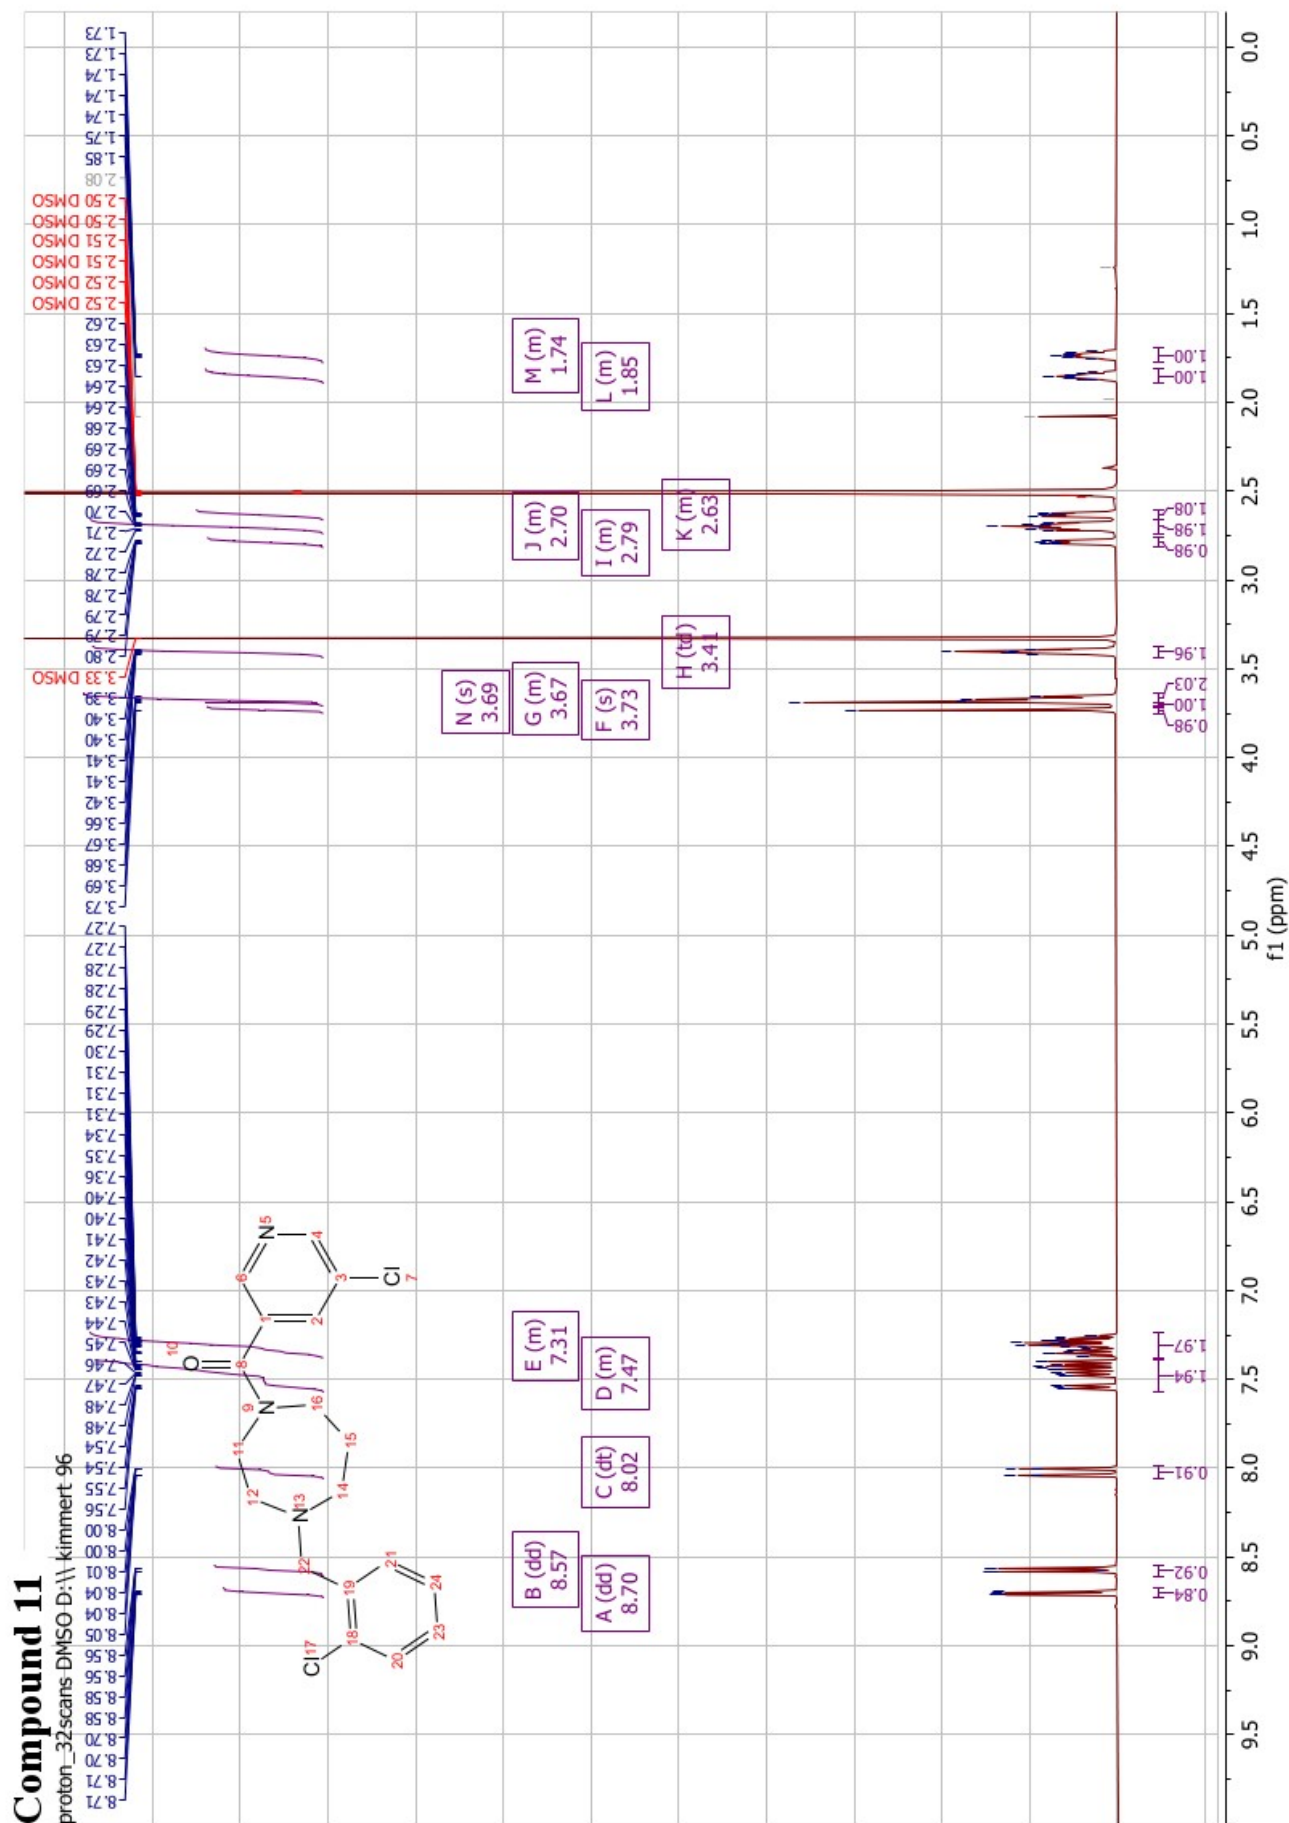



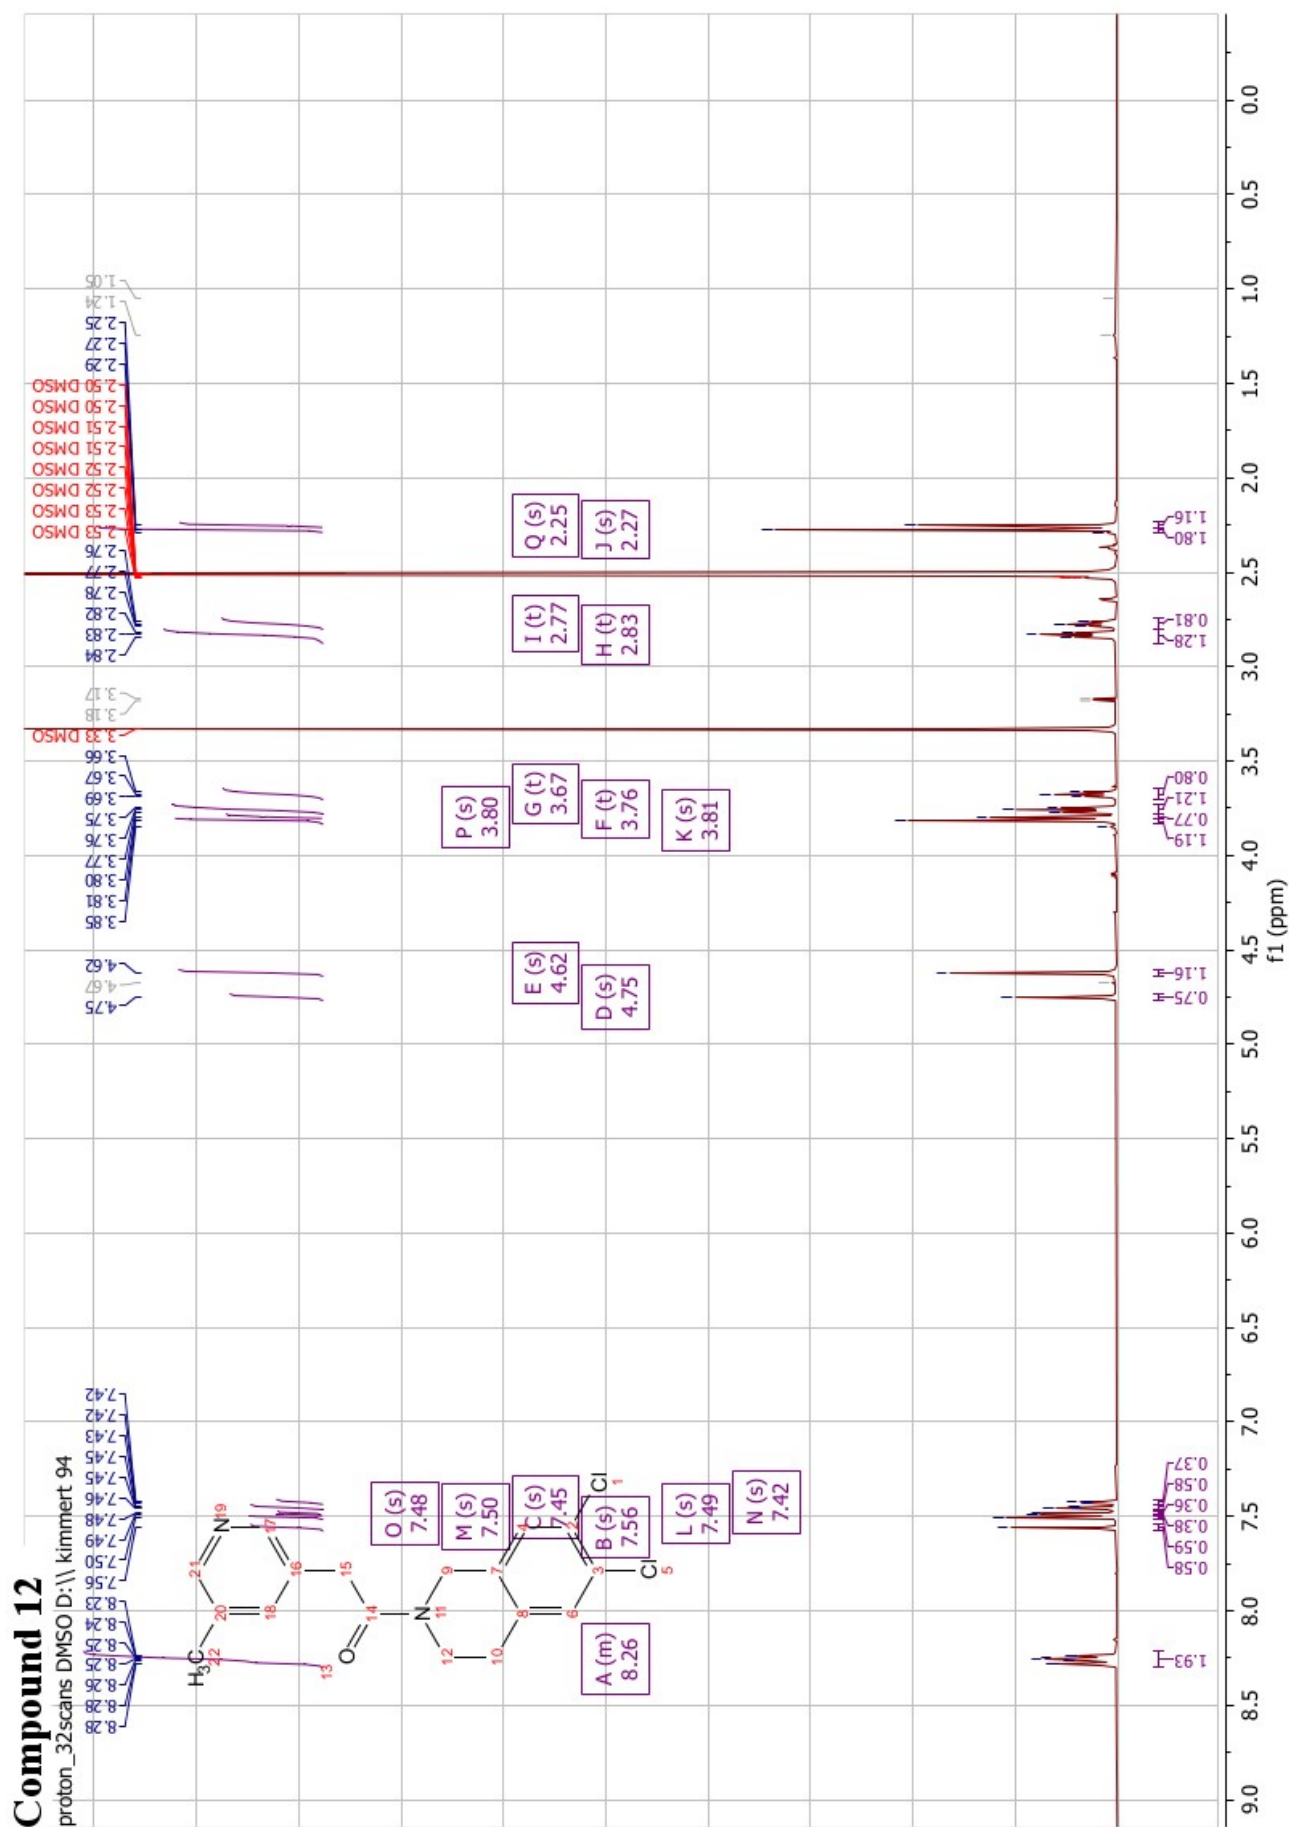

**Protein sequence pCG 163: 442 aa excl. stop codon**

→ Q306E mutation destroys occurring N-terminal selfcleavage site to maintain AVI-tag

**H6.SUMO.Covid-19 Mpro C145A Q306E.AVI**

(Thrombin cleavage site, SUMO cleavage site, residue Mpro autocleavage site)

|             |            |             |            |            |             |
|-------------|------------|-------------|------------|------------|-------------|
| 10          | 20         | 30          | 40         | 50         | 60          |
| MGSSHHHHH   | GSLVPRGS   | ASMSDSEVDQE | AKPEVKPEVK | PETHINLKVS | DGSSEIFFKI  |
| 70          | 80         | 90          | 100        | 110        | 120         |
| KKTTPLRRLM  | EAFAKRQKKE | MDSLRFlyDG  | IRIQADQTPE | DLDMEDNDII | EAHREQIGG↓S |
| 130         | 140        | 150         | 160        | 170        | 180         |
| GFRKMAFPG   | KVEGCMVQVT | CGTTTTLNGLW | LDDVVYCPRH | VICTSEDMLN | PNYEDLLIRK  |
| 190         | 200        | 210         | 220        | 230        | 240         |
| SNHNFLVQAG  | NVQLRVIGHS | MQNCVLKLV   | DTANPKTPKY | KFVRIQPGQT | FSVLACYNGS  |
| 250         | 260        | 270         | 280        | 290        | 300         |
| PSGVYQCAMR  | PNFTIKGSFL | NGSAGSVGFN  | IDYDCVSFCY | MHHMELPTGV | HAGTDLEGNF  |
| 310         | 320        | 330         | 340        | 350        | 360         |
| YGPFDVDRQTA | QAAGTDTTIT | VNVLAWLYAA  | VINGDRWFLN | RFTTTLNDFN | LVAMKYNYP   |
| 370         | 380        | 390         | 400        | 410        | 420         |
| LTQDHDVILG  | PLSAQTGIIV | LDMCASLKL   | LQNGMNGRTI | LGSALLEDEF | TPFDVVRQCS  |
| 430         | 440        | 442         |            |            |             |
| GVTFEGSGLN  | DIFEAQKIEW | HE *        |            |            |             |
